# Supplementary material for: Autophagy promotes cell survival by maintaining NAD(H) levels
Source: Research Square preprint supplement (doi:10.21203/rs.3.rs-659023/v1), 2021-07-12
Supplement: Supplementary file 1 [file b9dc1f1f1dbea22f7e93c05a.docx]

**Supplementary Information:**

**Autophagy promotes cell survival by maintaining NAD(H) levels**

Lucia Sedlackova†, Tetsushi Kataura†, Elena Seranova†, Congxin Sun†, Elsje G. Otten, Malkiel A. Cohen, Miruna Chipara, Adina Maria Palhegyi, David Shapira, Filippo Scialo, Rhoda Stefanatos,Kei-ichi Ishikawa, Niall Kenneth, Tong Zhang, Prashanta K. Panda, Malgorzata Zatyka, Luiz F.S.E. Silva, Jorge Torresi, Kevin J. Kauffman, Shupei Zhang, Dorothea Maetzel, Thiago G. Varga, Carl Ward, David Cartwright, Gareth G. Lavery, Gaurav Sahay, Yosef Buganim, Daniel G. Anderson, Animesh Acharjee, Charles C. Bascom, Ryan Tasseff, Robert J. Isfort, John E. Oblong, Joerg Gsponer, Satomi Miwa, Michael Lazarou, Manolis Papamichos Chronakis, Haoyi Wang, Masaya Imoto, Shinji Saiki, Oliver D.K. Maddocks, Alberto Sanz, Tatiana R. Rosenstock, Rudolf Jaenisch, Viktor I. Korolchuk*, Sovan Sarkar*

† These authors contributed equally to this work.

* Correspondence to: viktor.korolchuk@newcastle.ac.uk (V.I.K.), s.sarkar@bham.ac.uk (So.S.).

**Supplementary Information includes:**

Methods

Supplementary References 1–28

Supplementary Tables 1–5

Extended Data Fig. 1–16

Methods

**Culture of mammalian cells**

*Atg5+/+, Atg5-/-* MEFs (gift from Noboru Mizushima1), Npc1+/+ and Npc1−/− MEFs (gift from Peter Lobel2) were maintained in DMEM (Sigma-Aldrich) supplemented with 10 % fetal bovine serum (FBS) (Sigma-Aldrich), 100 U/mL penicillin/streptomycin (Sigma-Aldrich) and 2 mM L-glutamine (Sigma-Aldrich) at 37 °C, and 5 % CO2 in ahumidified incubator. HEK293T cells, purchased from Life Technologies (R700-07), were cultured as above in medium supplemented with 1X MEM non-essential amino acids (Sigma-Aldrich).

**Culture of human embryonic stem cells and human induced pluripotent stem cells**

Human embryonic stem cells [WIBR3 hESCs3; wild-type (*ATG5+/+*) and autophagy-deficient (*ATG5–/–*, clones #1, #3, #4, #5 and #6) hESC lines] and human induced pluripotent stem cells [hiPSCs; control_#13 (WIBR-IPS-NPC11920delG/wt, clone #13), NPC1-1_#4 and #13 (WIBR-IPS-NPC1I1061T/I1061T, clones #4 and #13) and NPC1-2_#26 (WIBR-IPS-NPC1P237S/I1061T, clone #26) hiPSC lines4] were cultured, as previously described3,4. Briefly, hESCs and hiPSCs were cultured on a feeder layer of inactivated mouse embryonic fibroblasts (MEFs) in hESC medium consisting of DMEM/F12 (Gibco), 15 % fetal bovine serum (HyClone), 5 % KnockOut Serum Replacement (Gibco), 1 % L-glutamine (Gibco), 1 % non-essential amino acids (Gibco), 1 % penicillin/streptomycin (Gibco), 4 ng/mL human recombinant basic fibroblast growth factor (bFGF; R&D Systems) and 0.1 mM β-mercaptoethanol (Sigma-Aldrich). For experimentation, the hESCs and hiPSCs were cultured feeder-free on Geltrex (Gibco) basement membrane matrix in StemFlex Basal Medium supplemented with StemFlex 10X Supplement (Gibco) and 1 % penicillin/streptomycin (Gibco), or on Matrigel (Stem Cell technologies) basement membrane matrix in mTeSR1 medium supplemented with mTeSR1 5X supplement (Stem Cell Technologies) and 1 % penicillin/streptomycin (Gibco). The hESCs and hiPSCs were maintained on feeders, or feeder-free, in a humidified incubator with 5 % CO2 and 5 % O2 at 37 °C. For starvation-induced autophagy, hESCs and hESC-derived neural precursors (NPs) were cultured in Hank’s Balanced Salt Solution (HBSS; Gibco) as indicated.

**Differentiation of hESCs and hiPSCs into neural precursors and human neurons**

Differentiation of hESCs and hiPSCs into neural precursor cells (NPs) and terminally differentiated human neurons were performed as previously described4,5. Briefly, hESC or hiPSC colonies were collected using 1.5 mg/mL collagenase type IV (Thermo Fisher Scientific), separated from the MEF feeder cells by gravity, and cultured in non-adherent suspension culture dishes (Corning) in NP medium (NPM) comprising of DMEM/F12 supplemented with 2 % B27, 1 % L-glutamine, 1 % nonessential amino acids and 1 % penicillin/streptomycin (all from Gibco) supplemented with 500 ng/mL human recombinant Noggin (Peprotech) and 10 μM SB431542 (Stemgent) for the first 4 days. NPM supplemented with 500 ng/mL Noggin and 20 ng/mL bFGF (R&D Systems) was used sequentially in the next 2 days (days 6-7), and NPM supplemented with only 20 ng/mL bFGF were used sequentially in the following 7 days (days 7-14) for further NP differentiation. At day 14, NPs clusters were dissociated and plated onto 100 μg/mL poly-L-ornithine (Sigma-Aldrich) and 14 μg/mL laminin (Sigma-Aldrich) pre-coated culture dishes in N2–B27 medium comprising of DMEM/F12 supplemented with 1 % N2, 2 % B27, 1 % L-glutamine, 1 % nonessential amino acids and 1 % penicillin/streptomycin (all from Gibco) supplemented with 20 ng/mL bFGF (R&D systems) and 20 ng/mL EGF (R&D systems). After 7 days in culture, neural rosette-bearing cultures were dissociated using StemPro Accutase (Thermo Fisher Scientific) and subsequently expanded on poly-L-ornithine and laminin coated cell culture dishes at the density of ~1.5×106 cells per well (of 6-well plate) in N2–B27 medium supplemented with 20 ng/mL bFGF and 20 ng/mL EGF. Proliferating NPs were passaged up to 4 times before induction of terminal differentiation into neurons by growth factor withdrawal in N2–B27 medium. Differentiated neurons were used for analysis 3-4 weeks after differentiation.

***Saccharomyces cerevisiae* experiments**

S288C (*MATα SUC2 gal2 mal2 mel flo1 flo8-1 hap1 ho bio1 bio6)* WT and *atg5Δ::KanMX*(gift from Charles Boone6) were maintained in synthetic complete medium (SC medium: 0.13 % drop-out CSM powder (Formedium), 0.17 % yeast nitrogen base (Formedium), 2 % glucose (Formedium), 0.5 % ammonium sulphate (Sigma-Aldrich). Strains were grown in SC medium to mid/late log phase (OD600 0.8–1) at 30 °C, then washed in dH2O and switched to a nitrogen starvation medium (SD-N medium: 0.17 % yeast nitrogen base, 2 % glucose (Formedium)). Cultures were collected 0, 2, 4 and 18 hours after the switch to SD-N medium for western blotting or after 3 days for NAD(H) measurement assays by snap freezing in liquid nitrogen.

***Drosophila melanogaster* experiments**

Daughterless-GAL4, UAS-Atg5-IR (BL34899) and the control attp2 (BL36303) were obtained from the Bloomington Drosophila Stock Center (BDSC). Flies were crossed and cultured on standard media (1 % agar (SLS), 1.5 % sucrose (VWR), 3 % glucose (VWR), 3.5 % active dried yeast (SLS), 1.5 % white maize meal (Asda), 1 % wheatgerm (MP biomedicals), 1 % soybean flour (Santa Cruz Biotechnology), 3 % treacle (Bidfood), 0.5 % propionic acid (VWR), 0.1 % Nipagin (Sigma-Aldrich). Eclosed male flies were collected using CO2 anesthesia and maintained at a density of 20 flies per vial at 25 °C. Flies were transferred to fresh vials every 2-3 days. 10- and 20-day-old flies were snap frozen in liquid nitrogen for western blotting and NAD(H) measurement assay, respectively.

**Generation of transient and stable mammalian cell lines**

Re-introduction of the *Atg5* gene into *Atg5-/-* MEFs, was achieved by packaging retroviruses in the HEK293FT (293FT) cell line. 293FT cells were seeded in a 10 cm dish (6.0x106 cells/10mL/dish) in antibiotic-free glucose culture medium. Next day, cells were transfected with plasmids containing the packaging psPAX2 (Addgene, 12260, from Didier Trono) and envelope pCMV-VSV-G (Addgene, 8454, from Bob Weinberg7) genes, and the pMXS-IP-eGFP (Addgene, 38192, from Noboru Mizushima8) or pMXs-IP-eGFP-mAtg5 (Addgene, 38196, from Noboru Mizushima8) constructs with Lipofectamine® 2000 transfection reagent (Invitrogen). Following overnight transfection, the medium was replaced with fresh antibiotic-free medium that was collected after 24 h. Virus containing medium was filtered through at 0.45 µm pore-size filter and overlaid on 70 % confluent *Atg5-/-* MEFs for 24 h in the presence of 10 μg/mL polybrene (Sigma-Aldrich). Cells stably expressing the *Atg5* gene were optimized for protein expression via 2 μg/mL puromycin (Santa Cruz Biotechnology) selection for 7 days.

Introduction of the *NDI1* gene into *Atg5-/-* MEFs was achieved by transient cell transfection. *Atg5-/-* MEFs were seeded in a 6-well plate, cultured for 24 h and transfected with either pWPI-eGFP (Addgene, 12254, from Didier Trono) or pWPI-eGFP-NDI1 9 constructs using the Lipofectamine® 2000 transfection reagent (Invitrogen) with 1.6 μg plasmid DNA according to manufacturer instruction 48 h prior to passaging and galactose culture.

**Generation of knockout mammalian cell lines using CRISPR/Cas9 gene editing**

*Atg5-/-*, *Atg7-/-* and *Rb1cc1-/-* MEFs were generated using the clustered regularly interspaced short palindromic repeats (CRISPR)/Cas9 system. Ensembl, Aceview and CHOPCHOP databases were utilized to design CRISPR guide RNAs (gRNAs) to target exons present in all splicing variants of the targeted gene (Supplementary Table 1). The gRNA oligomer was then annealed and ligated into Bbsl (Fisher Scientific) linearized pSpCas9(BB)-2A-GFP gRNA vector10. WT MEF cell line seeded into a 6-well plate was then used for transfection with DNA ligation products. Cells were allowed to grow for 24 h post seeding before transfection with Lipofectamine® 2000 (Invitrogen) with 1.6 μg plasmid DNA according to manufacturer’s instructions. GFP-positive cells were sorted by FACS into 96-well plates and expanded into colonies prior to screening for autophagy impairment by immunoblotting.

**Design of TALEN and targeting vector for *ATG5* gene knockout in hESCs**

A pair of TALENs targeting *ATG5* gene was designed and constructed, as previously described11. The sequence recognized by *ATG5* TALEN F is GAAATGGTGAGTGAAT, and *ATG5* TALEN R binds to AGTATATACTTAATGCT, with a 15 bp spacer sequence between these two binding sites. Targeting donor vector was designed as PGK-Puro-pA or PGK-Neo-pA cassette flanked by ~700 bp homology arms lying upstream and downstream of *ATG5* exon 3.

**Gene targeting in hESCs**

The WIBR3 hESC line was cultured in 10 μM ROCK inhibitor Y-27632 (Stemgent) for 24 h prior to electroporation. Cell were harvested and resuspended in phosphate buffered saline (PBS), and then electroporated with 40 μg of donor plasmids together with 5 μg of each TALEN-encoding plasmid via Gene Pulser Xcell System (Bio-Rad) at 250 V and 500 μF in 0.4 cm cuvettes. Cells were then plated on DR4 MEF feeders in hESC medium supplemented with ROCK inhibitor. Individual colonies were picked and expanded after 0.5 μg/mL puromycin (Gibco) or 400 μg/mL G418 selection (Gibco) for 10 to 14 days following electroporation. The correctly targeted clones were confirmed by Southern blot (NdeI digested) and Sanger sequencing.

**siRNA transfection in mammalian cells**

ON-TARGETplus SMARTpool siRNA against mouse Parp1 (L-040023-00), Sirt1 (L-049440-00) and nontargeting SMARTpool siRNA (D-001810-10) were purchased from Dharmacon. MEFs were seeded in a 6-well plate, cultured for 24 h and transfected with 100 nM siRNA with the Lipofectamine® 2000 transfection reagent (Invitrogen) for 24 h. Cells were then passaged and cultured for 24 h followed by second transfection with 20 nM siRNA for another 24 h prior to galactose culture.

**Galactose medium culture and supplementation in mammalian cells**

To induce mitochondrial respiration, cells seeded in a 6-well format (0.3x106 cells/2mL/well) were switched to a galactose medium (glucose-free DMEM (Gibco) supplemented with 10 mM D-galactose (Sigma-Aldrich), 10 mM HEPES (Sigma-Aldrich), 1 mM sodium pyruvate (Sigma-Aldrich), 4 mM L-glutamine (Sigma-Aldrich), 100 U/mLpenicillin/streptomycin (Sigma-Aldrich) and 10 % FBS (Sigma-Aldrich)) 24 h post-seeding. Galactose medium was supplemented with various compounds and inhibitors (Supplementary Table 2): 10-25 mM glucose (Sigma-Aldrich), 50 μM UK-5099 (Sigma-Aldrich), 20 μM Z-VAD-fmk (Enzo), 10 nM FK866 (Sigma-Aldrich), 20-50 μM sirtinol (Cambridge Biosciences), 10 μM olaparib (Cambridge Biosciences), 3-5 mM NAM (Sigma-Aldrich), 1 mM NR (ChromaDex), 10 mM L-tryptophan (Sigma-Aldrich), 1 nM oligomycin (Merck), 1 mM adenosine (Sigma-Aldrich), 1 mM guanosine (Sigma-Aldrich), 10 mM cytidine (Sigma-Aldrich), 10 mM uridine (Sigma-Aldrich), 10 mM thymidine (Sigma-Aldrich) or 10 μM ML385 (Sigma-Aldrich). All compound supplements were added at 0 h, except Z-VAD-fmk which was supplemented at 20 h. For hypoxia experiments, cells were incubated at 1 % O2 in an *in vivo* 400 hypoxia work station (Ruskin, UK). Cells were lysed for protein extracts in the chamber to avoid re-oxygenation.

**Compound treatment in hESC/hiPSC-derived neurons**

Compounds used for modulating cellular NAD+ and NADH levels in human neurons differentiated from hESCs or hiPSCs are (Supplementary Table 2): 1 mM Nicotinamide (NAM) (Sigma-Aldrich), 1 mM Nicotinamide riboside (NR) (ChromaDex) and 10 nM FK866 (Sigma-Aldrich). Compound treatment was done in hESC- and hiPSC-derived neurons for the last 6 days (with replenishment on third day) of the neuronal differentiation period (3-4 weeks).

**Formulation of lipid nanoparticles (LNPs) with mRNA and LNP-mediated mRNA delivery**

C12-200 (prepared as previously described12; courtesy of Alnylam Pharmaceuticals, Cambridge, MA) was mixed together with 1,2-dioleoyl-*sn*-glycero-3-phosphoethanolamine (DOPE; Avanti Polar Lipids, Alabaster, AL), cholesterol (Sigma-Aldrich), and 1,2-dimyristoyl-*sn*-glycero-3-phosphoethanolamine-N-[methoxy(polyethylene glycol)-2000] (ammonium salt) (PEG; Avanti) at a 50:20:20:10 weight ratio in ethanol. Then, an aqueous phase containing human *ATG5* or *GFP* mRNA (TriLink Biotechnologies, San Diego, CA) in 10 mM citrate buffer was prepared. Syringe pumps were used to mix the ethanol and aqueous phases at a 1:3 ratio, as previously described13, to generate C12-200 lipid nanoparticles (LNPs), which were then dialyzed against 1x PBS in a 20k MWCO cassette at 4 °C for 2 h. mRNA concentration was quantified using a modified Quant-iT RiboGreen RNA Assay (Invitrogen), as previously described14. Cells (hESCs and hESC-derived neurons) were treated with 2 µg/mL C12-200 LNP-encapsulating human *ATG5* or *GFP* mRNA, usually for 4 days with replenishment on day 2, or as indicated.

**Immunoblot analysis**

*Mammalian cells*: Immunoblotting on cells was performed as described previously15. In brief, cells were lysed on ice in RIPA buffer (Sigma-Aldrich) supplemented with 1x HaltTM protease and phosphatase inhibitor cocktail (Thermo Scientific). Protein concentration of lysates was measured using DC protein assay (Bio-Rad), and equal amounts of protein (20–40 µg) were subjected to SDS-PAGE.

*hESCs and hESC/hiPSC-derived NPs and neurons:* Cell lysates were subjected to immunoblot analysis, as previously described4,16,17. Cell pellets were lysed on ice in 2X Lysis Buffer comprising of 20 mM Tris-HCl pH 6.8, 137 mM NaCl, 1 mM EGTA, 1 % Triton X-100, 10 % glycerol and 25X Protease Inhibitor Cocktail (all from Sigma-Aldrich) (buffer made to 1X) for 30 min, boiled for 5-10 min at 100 °C. Protein concentration of the lysates was measured by Bio-Rad Protein Assay (Bio-Rad), and equal amounts of protein (15–40 µg) per sample were subjected to SDS–PAGE.

*S. cerevisiae:* Yeast sample preparation for immunoblotting based on a TCA protein extraction protocol. 10 mL cultures were grown in the appropriate medium to an OD600 of 0.8. Cells were pelleted by centrifugation and washed with 20 % TCA (Sigma-Aldrich). All of the following purification steps were performed on ice with pre-chilled solutions. Cell pellets were re-suspended in 100 μL of 20 % TCA and subjected to glass bead lysis. The supernatant was collected, 200 μL of 5 % TCA was added, and the precipitated proteins were pelleted by centrifugation. Protein pellets were solubilized in 30 μL of 2 M Tris pH 8.0 (Sigma-Aldrich) / 70 μL 3X SDS-PAGE loading buffer [60 mM Tris pH 6.8 (Sigma-Aldrich), 2 % SDS (Bio-Rad), 10 % glycerol (Sigma-Aldrich), 100 mM DTT (Sigma-Aldrich), 0.2 % bromophenol blue (Sigma-Aldrich)] and boiled at 95 °C for 5 min. Insoluble material was removed by centrifugation and the supernatant was subjected to SDS-PAGE analysis.

*D. melanogaster:* Fly sample preparation and immunoblotting were performed as described previously15. Briefly, 20 flies per group were homogenized on ice in a specialized buffer (1.5 % Triton X-100 (Promega), complete mini EDTA-free proteinase inhibitor (Sigma-Aldrich), PBS 1X). Protein concentration in the supernatant was measured using Bradford Reagent (Sigma-Aldrich), and equal amounts of protein were resolved by SDS-PAGE.

Membranes were first blocked in 5 % milk (Marvel) in PBS with 1x Tween® 20 (Sigma-Aldrich) for 1 h at room temperature and incubated with primary antibodies overnight at 4 °C on a shaker platform (full list of primary antibodies in Supplementary Table 3). Secondary antibodies conjugated to horseradish peroxidase (HRP) (Supplementary Table 3) were used at 1:5000 or 1:10000 dilution for 1 h at room temperature. In cell and fly samples, clarity western ECL substrate (Bio-Rad Laboratories) was used to visualise chemiluminescence on LAS4000 (Fujifilm). The chemiluminescent signal in yeast samples was generated by the SuperSignal West Pico Plus chemiluminescent substrate (Thermo Scientific) and detected on a G-box transilluminator (Syngene). In hESCs and hESC/hiPSC-derived cell samples, chemiluminescent signal was visualized using Amersham ECL or ECL Prime Western Blotting Detection Reagent and Amersham Hyperfilm ECL (GE Healthcare) via ECOMAX X-ray Film Processor (PROTEC). Densitometry analyses of immunoblots were done using ImageJ v1.48 (NIH) software. The data were expressed as a ratio or percentage of the control condition, as previously described4,15-17.

**BN-PAGE**

Mitochondria isolated from MEFs were processed for BN-PAGE and immunoblotting as published18. Briefly, 30 µg of isolated mitochondria were pelleted, re-suspended in solubilization buffer [20 mM BisTris pH 7.4 (Santa Cruz Biotechnology), 50 mM NaCl, 10 % glycerol, 10 mM DTT (Supelco)] supplemented with either 1 % triton X-100 (TX-100, Sigma-Aldrich) or 1 % digitonin (Dig, Santa Cruz Biotechnology) and incubated on ice for 20 min. Insoluble material was pelleted by centrifugation at 16 000 *g* for 10 min at 4 °C. The supernatant was mixed with a loading dye [100 mM BisTris pH 7.0 (Santa Cruz Biotechnology), 50 mM ε-amino n-caproic acid (Calbiochem), 5 % Coomassie blue G250 (Sigma-Aldrich)), resolved on a 4 %-13 % gradient acrylamide BN-PAGE gel [acrylamide (Severn Biotech), 150 mM BisTris pH 7.1, 200 mM ε-amino n-caproic acid, 0.1 % ammonium persulfate (Sigma-Aldrich), 0.13 % N,N,N’,N’-Tetramethylethylenediamine (TEMED)] and transferred onto a PVDF membrane followed by a standard immunoblotting protocol.

**Immunofluorescence**

Immunofluorescence analysis was performed on mammalian cells as described previously15-17. In brief, cells were washed once with 1x PBS (New England Biolabs). Cells were fixed in 4 % formaldehyde in PBS for 15 min at room temperature and permeabilized with 0.5 % Triton X-100 for 10 min at room temperature (or permeabilized in 100 % pre-chilled methanol (Fisher Scientific) for 5 min for LC3B staining). Cells were then incubated with blocking buffer (5 % goat or donkey serum (Sigma-Aldrich) in 1x PBS with or without 0.05 % Tween-20 (depending on the antibody specifications) for 1 h at room temperature and incubated with primary antibodies (full list of primary antibodies in Supplementary Table 4) overnight at 4 °C. Cells were washed and incubated with appropriate Alexa Fluor conjugated secondary antibodies (Supplementary Table 4) for 1 h at room temperature. Coverslips were mounted on slides with ProLongTM Gold antifade reagent with DAPI (Invitrogen).

**Image acquisition of fixed cells**

Fluorescence images of fixed cells were acquired using EVOS FL Cell Imaging System (Thermo Fisher Scientific) with AMG 10x Plan FL and AMG 40x Plan FL lens; Leica DM6000 B (Leica Microsystems) with Leica DFC 350 FX R2 camera and with HC PL APO 40x/1.25 or HC PL APO 100x/1.40 oil immersion lens with Leica Application Suite X software (Leica Microsystems); Axio observer Z1 microscope (Zeiss) with a Plan-Apochromat 20x/0.8 M27 air immersion objective equipped with an Axiocam 503 camera (Zeiss); or with Perkin Elmer UltraView spinning disk confocal system (Perkin Elmer) with an Orca-ER cooled–CCD camera (Hamamatsu) on a Zeiss Axiovert 200 (Carl Zeiss Inc.) with 63x 1.4NA plan-apochromat oil immersion lens using Volocity v6.1 software (Improvision).

**Electron Microscopy**

MEFs seeded in a 6-well format (0.3x106 cells/2 mL/well) were either re-fed glucose medium or switched to a galactose medium 24 h post-seeding. Following a 20 h incubation, cells were trypsinized, washed and collected and fixed overnight in 2 % glutaraldehyde in 0.1 M cacodylate buffer. After rinsing in buffer, the cells were post-fixed in 1 % osmium tetroxide + 1.5 % potassium ferricyanide, rinsed in deionized water then dehydrated through a graded series of acetone. Cells were infiltrated with epoxy resin (TAAB medium) and polymerized at 60 °C for 36 h. Ultrathin sections (70 nm) were picked up on copper grids and stained with uranyl acetate and lead citrate before being viewed on a 100kV CM100 TEM (FEI). Images of 10 cells per cell line were collected and quantified. Mitochondrial morphology of all organelles in a slice was scored in electron microscopy images as either ‘normal’ or ‘abnormal’ and expressed as a ratio of mitochondria with ‘abnormal’ morphology per cell.

For hESCs, cells were fixed in 2.5 % glutaraldehyde, 3 % paraformaldehyde with 5 % sucrose in 0.1 M sodium cacodylate buffer (pH 7.4), pelleted, and post-fixed in 1 % OsO4 in veronal-acetate buffer. The cell pellet was stained in block overnight with 0.5 % uranyl acetate in veronal-acetate buffer (pH 6), then dehydrated and embedded in Embed-812 resin. Sections were cut on Reichert Ultracut-E microtome with a Diatome diamond knife at 50 nm thickness setting, stained with uranyl acetate and lead citrate, then examined using Tecnai Spirit TEM (FEI) at 80 KV and photographed with AMT CCD camera, as previously described17.

**Gene expression analysis**

Total RNA was extracted using Trizol (Ambion) followed by DNase treatment using the RNase-free DNase set (Qiagen), as previously described19. Reverse transcription PCR (RT-PCR) was performed using M-MLV Reverse Transcriptase (Promega) and quantitative PCR (qPCR) was performed using the CFX Connect Real-Time System (Bio-Rad), as previously described19. 25 µM of primers (primer sequences in Supplementary Table 5) (Sigma-Aldrich) were used in SYBR Green mastermix (Applied Biosystems) that was added to 5 ng of cDNA. Results were analyzed using 2−ΔΔ*C*t method and were normalized to the expression of the housekeeping gene *GAPDH*.

**Separation of sub-cellular fractions in mammalian cells**

Mitochondria were isolated from a total of ~60 million (30×6-well) cells by manual cell homogenization in a specialized buffer (20 mM HEPES (pH 7.6) (Sigma-Aldrich), 220 mM D-mannitol (Sigma-Aldrich), 70 mM sucrose (Sigma-Aldrich), 1 mM EDTA (Sigma-Aldrich), 0.5 mM phenylmethylsulfonyl fluoride (Sigma-Aldrich) and 2 mM dithiothreitol (DTT) (Supelco)). Cell homogenates were centrifuged thrice at 800 *g* at 4 °C for 5 min to pellet cellular nuclei and membrane debris. Cytoplasmic and mitochondrial fractions were separated by centrifugation at 16 000 *g* at 4 °C for 10 min and immediately processed for an NAD+ and NADH measurement. Nuclear fractionation was performed as reported previously20 with slight modifications. Cells were collected from 1 x 10 cm dish and washed with ice-cold PBS. Then cells were suspended in 900 µL of 0.3 % ice-cold NP40 (Sigma-Aldrich) and 300 µL of the lysate was removed as whole cell lysate. The remaining 600 µL lysate was centrifuged for 10 sec in a tabletop centrifuge (ExtraGene mini centrifuge). The supernatant was removed as cytosolic fraction. The pellet was resuspended with 1 mL 0.3 % ice-cold NP40 and centrifuged for 10 sec by the tabletop centrifuge. The supernatant was discarded, and this step was repeated two more times. The pellet was diluted with 180 µL of 1x Laemmli sample buffer and sonicated for extracting nuclear fraction proteins.

**LC-MS-based metabolomics**

Metabolite extraction for liquid-chromatography-mass spectroscopy (LC-MS) was performed, as previously described21, on MEFs following a 16 h incubation in galactose medium. Cells were washed once with cold PBS (New England Biolabs) and lysed at a concentration of 2×106 cells/mL in a metabolite extraction buffer (50 % methanol (Fisher Scientific), 30 % acetonitrile (Sigma-Aldrich), 20 % dH2O). Samples were vortexed for 45 s, centrifuged at 16,100 *g* and supernatants subjected to LC-MS as follows, using a three-point calibration curve with universally labelled carbon-13/nitrogen-15 amino acids for quantification. Prepared samples were analyzed on a LC-MS platform consisting of an Accela 600 LC system and an Exactive mass spectrometer (Thermo Scientific). A Sequant ZIC-pHILIC column (4.6 mm x 150 mm, 5 μm) (Merck) was used to separate the metabolites with the mobile phase mixed by A=20 mM ammonium carbonate in water and B=acetonitrile. A gradient program starting at 20 % of A and linearly increasing to 80 % at 30 min was used followed by washing (92 % of A for 5 min) and re-equilibration (20 % of A for 10 min) steps. The total run time of the method was 45 min. The LC stream was desolvated and ionized in the HESI probe. The Exactive mass spectrometer was operated in full scan mode over a mass range of 70–1,200 m/z at a resolution of 50,000 with polarity switching. The LC-MS raw data was converted into mzML files by using ProteoWizard and imported to MZMine 2.10 for peak extraction and sample alignment. A house-made database integrating KEGG, HMDB and LIPID MAPS was used for the assignment of LCMS signals by searching the accurate mass and the metabolites used in the manuscript were confirmed by running their commercial standards. Finally, peak areas were used for comparative quantification.

Output from MS-based metabolomics was subjected to statistical analysis by MetaboAnalyst 4.0. We first performed a multivariate statistical principal component analysis (PCA). The variables were normalized by auto-scaling (mean-centered and divided by SD of each variable) by the MetaboAnalyst platform and then subjected to PCA analysis. Furthermore, a univariate statistical test coupled with fold change of each metabolite were plotted on a volcano plot. The significance cut-off was set to an adjusted *P*-value of 0.05 (-Log10(*P*-adjusted)>1,3) and a 2 fold-change (-1≥Log2(FC)≥1). 1.4-fold-change (-0.51≥Log2(FC)≥0.49 cut-off was applied for the analyses of differences between *Atg5-/-* and *Atg5-/-*+NAM. Statistical significance was determined using the Student’s *t-*test with *P* value corrected with false discovery rate (FDR) method of Benjamini and Hochberg which does not assume a consistent standard deviation (SD).

**Seahorse analysis**

MEFs seeded into Seahorse XF24 V7 assay plates (0.8×104 cells/well) (Agilent Technologies, 100777-004) were either re-fed glucose or switched to a galactose medium, 24 h post-seeding and 20 h prior to analysis. One hour before the assay, the media was switched to unbuffered respective media (with either glucose or galactose) and the plate was incubated at 37 ˚C without CO2. Oxygen consumption rates (OCR) and extracellular acidification rates (ECAR) were determined using Seahorse XF24 analyzer (Agilent Technologies) in the presence of different respiratory and glycolysis inhibitors which were sequentially added as follows: 1.5 μM oligomycin, 3 μM Carbonyl cyanide-4-(trifluoromethoxy)phenylhydrazone (FCCP), and a mixture of 0.5 μM Rotenone, 2.5 μM Antimycin A and 50 mM 2-deoxyglucose. Cellular energetics for ATP production rates by mitochondrial oxidative phosphorylation and glycolysis were calculated by using the OCR and ECAR22 based on the methods described23, taking into account the acidification rates due to mitochondrial CO2 production.

**MitoSOX staining**

MEFs seeded onto 13 mm coverslips in a 6-well format (0.3×106 cells/2mL/well) were either re-fed glucose medium or switched to a galactose medium 24 h post-seeding. A final concentration of 2.5 µM MitoSOX (Invitrogen) was added directly into culture medium followed by a 10 min incubation at 37 °C in the dark. MEFs were then fixed in 3.7 % formaldehyde for 5 min, washed thrice in 1x PBS and mounted on glass slides using a non-DAPI fluoroshield mounting medium (Abcam). Fluorescence images of fixed cells were compiled at RT on an inverted DMi8-CS microscope (Leica) with a Plan-Apochromat 40x/1.30 oil immersion objective, equipped with an ORCA-Flash4v2.0 camera (Hamamatsu). MitoSOX staining intensity was analyzed in Image J (version 1.41; NIH) by outlining single cells as regions of interest and calculation of the raw integrated density value per cell. Quantification was performed on 30–40 cells per condition.

**Mitochondrial** ΔΨm **and ROS measurements**

For measuring mitochondrial ΔΨm inMEFs, cells were grown in 96-well glass bottom dishes (Greiner Bio-One) (0.8×104 /100 μL/well, 24 h). Following culture in glucose or galactose media for 40 h, cells were co-stained with 16.7 nM tetramethylrhodamine methylester (TMRM; Invitrogen) and 100 nM Mitotracker Green (MTG; Invitrogen). A 10x stock of each compound was prepared in conditioned glucose or galactose medium (24 h culture on *Atg5-/-* MEFs, collected and filtered through a 0.22 µm pore-size filter) and added directly to culture wells. Following a 30 min incubation in the dark at 37 °C, TMRM- and MTG-containing medium was replaced by dye-free conditioned galactose medium. Live cell imaging was performed in a maintained atmosphere of 37 °C and 5 % CO2 using an LSM700 microscope (Zeiss) with a C-Apochromat 40x/1.20 water immersion lens, capturing images line sequentially. Mitochondrial membrane potential image analysis was performed in ImageJ (version 1.41; NIH) by outlining single cells as regions of interest and calculation of a ratio of TMRM to MTG raw integrated density values per cell. Quantification was performed on 30–40 cells per condition.

For hESC-derived neurons, measurements of mitochondrial ΔΨm and reactive oxygen species (ROS) were performed as previously described24. Briefly, cells were loaded with Microscopy Medium comprising of 120 mM NaCl, 3.5 mM KCl, 0.4 mM KH2PO4, 5 mM NaHCO3, 1.2 mM NaSO4, 20 mM HEPES and 15 mM glucose in dH2O adjusted to pH 7.4 and supplemented with 1 mM CaCl2 (all from Sigma-Aldrich), and incubated with 500 nM TMRE (for mitochondrial ΔΨm measurement; Invitrogen) and 20 µM CM-H2DCFDA (for ROS measurement; Invitrogen) for 1 h at 37 ºC. The fluorescence signals of TMRE and CM-H2DCFDA were acquired using EnSpire Multimode plate reader (Perkin Elmer) for a period of 5 min to get basal fluorescence, and again for TMRE for another 5 min after the addition of 10 µM FCCP to obtain maximum fluorescence. The baseline fluorescence was calculated as the mean of the last 10 reading points before the addition of FCCP (for TMRE and CM-H2DCFDA), and the delta (Δ) fluorescence was calculated by subtracting the basal fluorescence from the maximum fluorescence intensity after FCCP treatment (for TMRE only). Data were obtained as relative fluorescence units, normalized to protein concentration via Bio-Rad Protein Assay, and expressed as a percentage of the control (wild-type) condition.

**Mitochondrial rod/branch length analysis in neurons**

Cells (hESC-derived neurons) were incubated with 100 nM MitoTracker Red CMXRos for 45 min at 37 °C or subjected to immunofluorescence with Tom20 antibody, followed by immunostaining with TUJ1 antibody (neuronal marker). Mitochondrial rod/branch length analysis was done as previously described25. Briefly, measurement of mitochondrial rod/branch length was done per field of view for neurons (~4 images per sample and 200-4000 fragments per image were analyzed) using the Analyze Skeleton plugin from the Mitochondrial Network Analysis (MiNA) toolset in ImageJ v1.41 (NIH).

**NAD+ and NADH measurements**

Measurements of NAD+ and NADH in mammalian whole cell lysates, mitochondrial lysates, and in yeast cells and flies were performed as described in a published protocol26. In brief, NAD+ or NADH were extracted with an acidic solution (10 % (mitochondria, mammalian cell, fly) or 20 % (yeast) trichloroacetic acid (TCA) (Sigma-Aldrich) or a basic solution (0.5 M sodium hydroxide (NaOH, Sigma-Aldrich), 5 mM EDTA (Sigma-Aldrich)), respectively. NAD+ and NADH pools from cellular cytoplasmic fractions were extracted by addition of 5x concentrated stocks of TCA and NaOH/EDTA solutions into the cytoplasmic supernatant. Samples were adjusted to pH 8 with 1 M Tris (Sigma-Aldrich). NAD+ and NADH levels were determined by fluorescence intensity of resorufin produced by an enzymatic cycling reaction using resazurin (Sigma-Aldrich), riboflavin 5’-monophosphate (Sigma-Aldrich), alcohol dehydrogenase (Sigma-Aldrich) and diaphorase (Sigma-Aldrich). Fluorescence intensity was monitored every minute for a total 60 min using a microplate reader (FLUOstar Omega, BMG Labtech). NAD+ and NADH levels were determined by a β-NAD(Sigma-Aldrich) standard curve and adjusted to protein concentration determined by the DC protein assay (BioRad).

Measurements of NAD+ and NADH in hESC- and hiPSC-derived neurons were done using NAD/NADH Quantitation Colorimetric Kit (BioVision) according to manufacturer’s instructions. Briefly, control, *ATG5-/-* and NPC1 neurons were washed with cold PBS, then lysed with NADH/NAD Extraction Buffer and immediately freeze-thawed twice on dry ice, then centrifuged at 14,000 rpm for 5 min at 4 °C. Half of the supernatant was incubated at 60 °C for 30 min to decompose the NAD and detect the NADH. Both halves of the supernatants were then cooled on ice, transferred into a 96-well plate, followed by incubation in Reaction Mix comprising of NAD Cycling Buffer and NAD Cycling Enzyme Mix for 5 min at room temperature. Then NADH Developer was added to each well and the reaction was left to cycle for 1-2 h at room temperature. Measurements of optical density (OD) at 450 nm using the EnSpire Multimode plate reader (Perkin Elmer) were performed every 20-30 min to detect the saturating OD, then normalized to protein concentration via Bio-Rad Protein Assay to measure pmol/µg of NAD+ and NADH.

**ATP and ADP measurements**

Measurements of ATP and ADP in hESC-derived neurons were done using ApoSENSOR ADP/ATP Ratio Bioluminescent Assay Kit (BioVision) according to manufacturer’s instructions. Briefly, a Reaction Mix containing Nucleotide Releasing Buffer (NRB) and ATP monitoring enzyme was added in the wells of a white-walled 96-well plate and kept at room temperature for 1 h to burn residual ATP levels. Cells cultured in another 96-well plate were incubated with NRB for 5 min at room temperature to release the ATP, and then the supernatant was transferred to the appropriate wells of the white-walled 96-well plate. Luminescence was measured using EnSpire Multimode plate reader (Perkin Elmer) for determining ATP levels, and again measured after adding ADP Converting Enzyme for determining ADP levels. Data were normalized to protein concentration via Bio-Rad Protein Assay and expressed as a percentage of the control condition (*ATG5+/+* cells).

**Axonal length measurement in neurons**

Cells (hESC-derived neurons) immunostained with TUJ1 antibody (neuronal marker) were imaged and analyzed for axonal length (~5 images per sample and 1000-1500 lines per image were analyzed) using the Analyze Skeleton plugin in the ImageJ v1.41 (NIH).

**Assessment of autophagy in yeast and *Drosophila***

*S. cerevisiae*:Autophagic activity was assessed upon transformation of WT and *atg5Δ::KanMX* strains with a GFP-ATG8(416)/GFP-AUT7(416) plasmid [Addgene, 49425, from Daniel Klionsky27]. Transfected strains were switched to SD-N media and collected prior to the switch (0 h) and at 2 h, 4 h and 18 h time-points following the switch. Samples equivalent to 5 mL at OD600 1, were taken at the indicated times for protein extraction and immunoblot analysis.

*D. melanogaster*: Levels of Ref(2)P as a proxy for autophagy-mediated degradation of intracellular substrate were probed by immunoblotting of 10 d whole fly lysates28.

**DNA damage analysis by γH2AX**

MEFs were immunostained with γH2AX antibody, and the frequency of γH2AX puncta was assessed by automatic counting using a custom-made plugin in ImageJ (version 1.41; NIH). Quantification was performed on at least 40 cells per condition.

**Cell death assays in MEFs**

Adherent and floating cells were collected and processed by protein extraction and immunoblot analysis of caspase-3 cleavage at 24 h (*Atg5-/-*), 72 h (Npc1+/+ and Npc1−/−) and 110 h (all CRISPR-Cas9 generated cell lines) after media switch. Representative phase-contrast images and fluorescence images stained with ReadyProbes Cell Viability Imaging Kit were obtained on an inverted DM-IL Leica microscope equipped with an Invenio 3SII digital camera (3.0 Mpix Colour CMOS; Indigo Scientific).

**Cytotoxicity assay**

Cytotoxicity was measured using CytoTox-Glo Cytotoxicity Assay (Promega) according to manufacturer instruction. This luminescence-based cytotoxicity assay measures the extracellular activity of a distinct dead-cell protease when it is released from membrane-compromised cells. For analysis in MEFs, cells were cultured for 40 h after media switch (unless otherwise stated). For analysis in hESC-derived neurons, neuronal differentiation was done for 3-4 weeks or as indicated. In brief, cells in 96-well plates were incubated with CytoTox-Glo Assay Reagent (comprising of Assay Buffer and AAF-Glo Substrate) for 15 min at room temperature in the dark, then luminescence was measured using GloMax plate-reader (Promega) or EnSpire Multimode plate reader (Perkin Elmer) and the readings obtained were attributed to the basal cytotoxicity per well (first reading). To estimate cell population per well, cells were further incubated with Lysis Reagent (comprising of Assay Buffer and Digitonin) for 30 min at room temperature in the dark, after which luminescence was measured again (second reading). Cytotoxicity data were normalized by dividing the first reading (basal cytotoxicity per well) to the second reading (indicative of cell population per well) and expressed as a percentage.

**TUNEL staining for apoptotic neuronal cells**

Neurons differentiated from hESCs or hiPSCs were stained with Click-iT Plus TUNEL Assay for in situ apoptosis detection, Alexa Fluor 488 dye (Invitrogen), according to the manufacturer’s protocol. Briefly, cells (hESC- and hiPSC-derived neurons) were fixed with 4 % formaldehyde (Thermo Fisher Scientific) for 15 min and permeabilized with 0.25 % Triton X-100 (Sigma-Aldrich) for 20 min at room temperature, then washed with deionized water. Cells were incubated at 37 °C for 10 min in TdT reaction buffer, followed by incubation with TdT reaction mixture containing TdT reaction buffer, EdUTP, TdT enzyme for 60 min at 37 °C, washed with 3 % BSA, and finally incubated with Click-iT Plus TUNEL reaction cocktail for 30 min at 37 °C followed by washes with 3 % BSA. For detection of TUNEL+ apoptotic nuclei specifically in neurons, cells were subjected to immunofluorescence by blocking with 3 % BSA (in PBS) followed by incubation with anti-TUJ1 antibody (in 3% BSA in PBS) overnight at 4 °C, and thereafter incubated with Alexa Fluor 594 secondary antibody for 1 h at room temperature. Coverslips were mounted on glass slides with ProLong Gold antifade reagent with DAPI (Invitrogen). The quantification of TUNEL+ apoptotic nuclei in TUJ1+ neuronal cells was performed via fluorescence microscopy, as previously described4. The percentage of TUNEL+ nuclei was calculated from the total number of TUJ1+ cells analyzed (~200-300 cells per sample were analyzed).

**DAPI staining for apoptotic nuclear morphology**

For analyzing apoptotic nuclei morphology by DAPI staining in hESC-derived neurons immunostained with TUJ1 antibody (neuronal marker), the percentage of apoptotic nuclei was calculated from the total number of TUJ1+ cells (~150-200 cells per sample were analyzed).

**Statistical analysis**

All experiments were carried out in three or more biological replicates. Quantifications of data are described under various methods sections where applicable. Graphical data denote the mean ± s.e.m (of *n* = 3 or more biological replicates) and are depicted by column graph scatter dot plot using Prism 8.3.1 software (GraphPad). Unless indicated otherwise, the *P* values for analyses was determined by Student’s *t* test (two-tailed, unpaired) using Prism 8.3.1 software (GraphPad). *, *p*<0.05; **, *p*<0.01; ***, *p*<0.001; ns (non-significant).

**Data availability**

The source files of all the raw data will be provided during the revision process. The mass spectrometry metabolomics source data will be deposited to a public repository and the accession code will be supplied before publication.

**Supplementary References**

1 Kuma, A. *et al.* The role of autophagy during the early neonatal starvation period. *Nature* **432**, 1032-1036 (2004).

2 Loftus, S. K. *et al.* Murine model of Niemann-Pick C disease: mutation in a cholesterol homeostasis gene. *Science* **277**, 232-235 (1997).

3 Lengner, C. J. *et al.* Derivation of pre-X inactivation human embryonic stem cells under physiological oxygen concentrations. *Cell* **141**, 872-883 (2010).

4 Maetzel, D. *et al.* Genetic and chemical correction of cholesterol accumulation and impaired autophagy in hepatic and neural cells derived from Niemann-Pick Type C patient-specific iPS cells. *Stem Cell Rep.* **2**, 866-880 (2014).

5 Cohen, M. A., Itsykson, P. & Reubinoff, B. E. Neural differentiation of human ES cells. *Curr. Protoc. Cell Biol.* **Chapter 23**, Unit 23.7 (2007).

6 Tong, A. H. *et al.* Systematic genetic analysis with ordered arrays of yeast deletion mutants. *Science* **294**, 2364-2368 (2001).

7 Stewart, S. A. *et al.* Lentivirus-delivered stable gene silencing by RNAi in primary cells. *RNA* **9**, 493-501 (2003).

8 Hara, T. *et al.* FIP200, a ULK-interacting protein, is required for autophagosome formation in mammalian cells. *J. Cell Biol.* **181**, 497-510 (2008).

9 Cannino, G. *et al.* Glucose modulates respiratory complex I activity in response to acute mitochondrial dysfunction. *J. Biol. Chem.* **287**, 38729-38740 (2012).

10 Ran, F. A. *et al.* Genome engineering using the CRISPR-Cas9 system. *Nat. Protoc.* **8**, 2281-2308 (2013).

11 Cermak, T. *et al.* Efficient design and assembly of custom TALEN and other TAL effector-based constructs for DNA targeting. *Nuc. Acids Res.* **39**, e82 (2011).

12 Love, K. T. *et al.* Lipid-like materials for low-dose, in vivo gene silencing. *Proc. Natl. Acad. Sci. U.S.A.* **107**, 1864-1869 (2010).

13 Kauffman, K. J. *et al.* Optimization of lipid nanoparticle formulations for mRNA delivery in vivo with fractional factorial and definitive sreening designs. *Nano Lett.* **15**, 7300-7306 (2015).

14 Heyes, J., Palmer, L., Bremner, K. & MacLachlan, I. Cationic lipid saturation influences intracellular delivery of encapsulated nucleic acids. *J. Control Release* **107**, 276-287 (2005).

15 Carroll, B. *et al.* Oxidation of SQSTM1/p62 mediates the link between redox state and protein homeostasis. *Nat. Commun.* **9**, 256 (2018).

16 Seranova, E., Ward, C., Chipara, M., Rosenstock, T. R. & Sarkar, S. In vitro screening platforms for identifying autophagy modulators in mammalian cells. *Methods Mol. Biol.* **1880**, 389-428 (2019).

17 Sarkar, S. *et al.* Impaired autophagy in the lipid-storage disorder Niemann-Pick type C1 disease. *Cell Rep.* **5**, 1302-1315 (2013).

18 Formosa, L. E. *et al.* Dissecting the roles of mitochondrial complex I intermediate assembly complex factors in the biogenesis of complex I. *Cell Rep.* **31**, 107541 (2020).

19 Hummon, A. B., Lim, S. R., Difilippantonio, M. J. & Ried, T. Isolation and solubilization of proteins after TRIzol extraction of RNA and DNA from patient material following prolonged storage. *Biotechniques* **42**, 467-470, 472 (2007).

20 Suzuki, K., Bose, P., Leong-Quong, R. Y., Fujita, D. J. & Riabowol, K. REAP: A two minute cell fractionation method. *BMC Res. Notes* **3**, 294 (2010).

21 Maddocks, O. D., Labuschagne, C. F., Adams, P. D. & Vousden, K. H. Serine metabolism supports the methionine cycle and DNA/RNA methylation through de novo ATP synthesis in cancer cells. *Mol. Cell* **61**, 210-221 (2016).

22 Mavin, E. *et al.* Real-time measurement of cellular bioenergetics in fully differentiated human nasal epithelial cells grown at air-liquid-interface. *Am. J. Physiol. Lung Cell. Mol. Physiol.* **318**, L1158-L1164 (2020).

23 Mookerjee, S. A. & Brand, M. D. Measurement and analysis of extracellular acid production to determine glycolytic rate. *J. Vis. Exp.*, e53464 (2015).

24 Silva, L. F. S. E., Brito, M. D., Yuzawa, J. M. C. & Rosenstock, T. R. Mitochondrial dysfunction and changes in high-energy compounds in different cellular models associated to hypoxia: Implication to schizophrenia. *Sci. Rep.* **9**, 18049 (2019).

25 Valente, A. J., Maddalena, L. A., Robb, E. L., Moradi, F. & Stuart, J. A. A simple ImageJ macro tool for analyzing mitochondrial network morphology in mammalian cell culture. *Acta Histochem.* **119**, 315-326 (2017).

26 Kanamori, K. S. *et al.* Two different methods of quantification of oxidized nicotinamide adenine dinucleotide (NAD(+)) and reduced nicotinamide adenine dinucleotide (NADH) intracellular levels: Enzymatic coupled cycling assay and ultra-performance liquid chromatography (UPLC)-mass spectrometry. *Bio. Protoc.* **8**, e2937 (2018).

27 Guan, J. *et al.* Cvt18/Gsa12 is required for cytoplasm-to-vacuole transport, pexophagy, and autophagy in Saccharomyces cerevisiae and Pichia pastoris. *Mol. Biol. Cell* **12**, 3821-3838 (2001).

28 Klionsky, D. J. *et al.* Guidelines for the use and interpretation of assays for monitoring autophagy (4th edition). *Autophagy* **17**, 1-382 (2021).

Supplementary Table 1.

| **Accession number** | **Target gene/ Exon** | **Species** | **Primer name** | **Primer sequence** |
| --- | --- | --- | --- | --- |
| NM_053069 - isoform 1 | *Atg5/exon7* | Mouse | FW_Atg5msCRe7h7 | 5’ caccgCTTTCATCCAGAAGCTGTTC 3’ |
| RE_Atg5msCRe7h7 | 5’ aaacGAACAGCTTCTGGATGAAAGc 3’ |
| NM_001253717 | *Atg7/exon4* | Mouse | FW_Atg7msCRe4h10 | 5’ caccgCACTGAACTCCAACGTCAAG 3’ |
| RE_Atg7msCRe4h10 | 5’ aaacCTTGACGTTGGAGTTCAGTGc 3’ |
| NM_009826.4 | *Rb1cc1/exon 10* | Mouse | FW_Fip200msCe10h1 | 5’ caccgCTAACAGCTCTATTACAAGG 3’ |
| RE_Fip200msCe10h1 | 5’ aaacCCTTGTAATAGAGCTGTTAGc 3’ |

**Supplementary Table** **1. Primers used for CRISPR gRNA generation.**

The primers used for generating CRISPR gRNA are indicated, for creating *Atg5-/-*, *Atg7-/-* and *Rb1cc1-/-* cell lines in MEFs.

Supplementary Table 2.

| **Compound name** | **Working concentration** | **Cell type used** | **Source** |
| --- | --- | --- | --- |
| Adenosine | 1 mM | MEFs | Sigma-Aldrich |
| Cytidine | 10 mM | MEFs | Sigma-Aldrich |
| D-(+)-Galactose | 10 mM | MEFs | Sigma-Aldrich |
| D-(+)-Glucose | 10-25 mM | MEFs | Sigma-Aldrich |
| FK866 | 10 nM | MEFs, hESC-derived neurons | Sigma-Aldrich |
| Guanosine | 1 mM | MEFs | Sigma-Aldrich |
| L-Tryptophan | 10 mM | MEFs | Sigma-Aldrich |
| ML385 | 10 μM | MEFs | Sigma-Aldrich |
| Nicotinamide (NAM) | 3-5 mM (MEFs),  1 mM (Neurons) | MEFs, hESC-derived neurons, hiPSC-derived neurons | Sigma-Aldrich |
| Nicotinamide riboside (NR) | 1 mM | MEFs, hESC-derived neurons | ChromaDex |
| Olaparib | 10 μM | MEFs | Cambridge Biosciences |
| Oligomycin | 1 nM | MEFs | Merck |
| Sirtinol | 20-50 μM | MEFs | Cambridge Biosciences |
| Thymidine | 10 mM | MEFs | Sigma-Aldrich |
| UK-5099 | 50 μM | MEFs | Sigma-Aldrich |
| Uridine | 10 mM | MEFs | Sigma-Aldrich |
| Z-VAD-FMK | 20 μM | MEFs | Enzo Life Sciences |

**Supplementary Table** **2. Compounds used in cell culture experiments.**

Compounds used for treatment in cell culture experiments are indicated, together with their working concentration, cell type used and the source (company). See Methods for treatment duration. MEFs: Mouse embryonic fibroblasts; hESC: Human embryonic stem cell; hiPSC: Human induced pluripotent stem cell.

Supplementary Table 3.

| Antigen | Source | Catalogue number | Dilution |
| --- | --- | --- | --- |
| Primary antibodies | | | |
| Acetylated lysine | Cell Signaling Technology | 9441 | 1:1000 |
| Actin (for MEFs) | Cell Signaling Technology | 4970 | 1:10000 |
| Actin (for hESCs and hESC-derived cells) | Sigma-Aldrich | MABT1333 | 1:4000 |
| AIF | Cell Signaling Technology | 5318 | 1:1000 |
| ATG5 (for MEFs) | Sigma-Aldrich | A0856 | 1:1000 |
| ATG5 (for hESCs and hESC-derived cells) | NanoTools | 0262-100/ATG5-7C6 | 1:400 |
| Cleaved caspase-3(Asp175) | Cell Signaling Technology | 9661 | 1:200 |
| GAPDH | Sigma-Aldrich | G8795 | 1:5000 |
| GFP (for MEFs) | Santa Cruz Biotechnology | sc-9996 | 1:2000 |
| GFP (for yeast) | Roche | 11814460001 | 1:2000 |
| GFP (for hESCs and hESC-derived cells) | Clontech | 632375 | 1:5000 |
| γH2AX | Millipore | 05-636 | 1:2000 |
| LC3B (for MEFs) | Cell Signaling Technology | 3868 | 1:1000 |
| LC3B (for hESCs and hESC/hiPSC-derived cells) | Novus Biologicals | NB100-2220 | 1:2000 |
| MAP2 | Invitrogen | PA5-17646 | 1:5000 |
| NDI1 | Gift from Takao Yagi's lab (Scripps Institute, CA) | | 1:1000 |
| NDUFA9 | Abcam | ab14713 | 1:1000 |
| NDUFS3 | Abcam | ab110246 | 1:1000 |
| NESTIN | BioLegend | 656802 | 1:2000 |
| p62 (for MEFs) | Progen | GP62-C-WBC | 1:2000 |
| p62 (for hESCs and hESC/hiPSC-derived cells) | BD Biosciences | 610832 | 1:1000 |
| p70 S6 kinase | Cell Signaling Technology | 9202 | 1:1000 |
| Pan-ADP-ribose | Millipore | MABE1016 | 1:1000 |
| PARP1 | Cell Signaling Technology | 9532 | 1:1000 |
| PAX6 | BioLegend | 901301 | 1:2000 |
| Phospho-p70 S6 kinase(Thr389) | Cell Signaling Technology | 9206 | 1:1000 |
| Phospho-S6 ribosomal protein (Ser235/236) | Cell Signaling Technology | 2211 | 1:4000 |
| Poly(ADP-ribose) | Enzo Life Sciences | ALX-804-220-R100 | 1:1000 |
| Ref(2)P | Abcam | ab178440 | 1:1000 |
| S6 ribosomal protein | Cell Signaling Technology | 2217 | 1:4000 |
| SDHA | New England Biolabs | 11998 | 1:1000 |
| SIRT1 | Millipore | 07-131 | 1:1000 |
| SOX2 | R&D Systems | AF2018 | 1:500 |
| Tom20 | Santa Cruz Biotechnology | sc-17764 | 1:5000 |
| Total γH2AX | Cell Signaling Technology | 2595 | 1:1000 |
| Tubulin (for flies) | Abcam | ab179513 | 1:5000 |
| Tubulin (for hESCs and hESC-derived cells) | Sigma-Aldrich | T6793 | 1:5000 |
| TUJ1 (TUBB3) | BioLegend | 801201 | 1:5000 |
| VDAC | Abcam | ab14734 | 1:1000 |
| Secondary antibodies | | | |
| Goat anti-mouse IgG, H&L chain specific peroxidase conjugate | Merck | 401253 | 1:5000, 1:10000 |
| Goat anti-rabbit IgG, H&L chain specific peroxidase conjugate | Merck | 401393 | 1:5000, 1:10000 |
| Rabbit anti-guinea pig IgG, peroxidase conjugate | Agilent | P014102 | 1:5000 |
| Rabbit anti-goat IgG, H&L chain specific peroxidase conjugate | Merck | 401515 | 1:5000, 1:10000 |

**Supplementary Table** **3. List of primary and secondary antibodies for immunoblotting.**

Supplementary Table 4.

| Antigen | Source | Catalogue number | Dilution |
| --- | --- | --- | --- |
| Primary antibodies | | | |
| γH2AX | Millipore | 05-636 | 1:10000 |
| LC3B | NanoTools | 0231-100/LC3-5F10 | 1:200 |
| MAP2 | Invitrogen | PA5-17646 | 1:200 |
| NANOG | R&D Systems | SC009 | 1:100 |
| NESTIN | BioLegend | 656802 | 1:100 |
| OCT-3/4 | R&D Systems | SC009 | 1:100 |
| PAX6 | BioLegend | 901301 | 1:100 |
| SOX2 | R&D Systems | SC009 | 1:100 |
| SSEA4 | R&D Systems | SC009 | 1:100 |
| Tom20 | Santa Cruz Biotech. | sc-17764 | 1:100 |
| TRA-1-60 | R&D Systems | MAB4770 | 1:100 |
| TUJ1 (TUBB3) | BioLegend | 801201 | 1:200 |
| Secondary antibodies | | | |
| Goat anti-mouse IgG (H+L), Alexa Fluor 488 | Invitrogen | A-11001 | 1:1000 |
| Goat anti-mouse IgG (H+L), Alexa Fluor 594 | Invitrogen | A-11005 | 1:1000 |
| Goat anti-rabbit IgG (H+L), Alexa Fluor 488 | Invitrogen | A-11008 | 1:1000 |
| Goat anti-rabbit IgG (H+L), Alexa Fluor 594 | Invitrogen | A-11012 | 1:1000 |
| Donkey anti-goat IgG (H+L), Alexa Fluor 488 | Invitrogen | A-11055 | 1:1000 |

**Supplementary Table 4. List of primary and secondary antibodies for immunofluorescence analysis.**

Supplementary Table 5.

| **Gene** | **Species** | **Primer name** | **Primer sequence** |
| --- | --- | --- | --- |
| *NANOG* | Human | *NANOG* Forward | TGTGTACTCAATGATAGATT |
| *NANOG* Reverse | GTCTTCACCTGTTTGTAG |
| *POU5F1* | Human | *POU5F1* Forward | TCTATTTGGGAAGGTATTC |
| *POU5F1* Reverse | TTGCATATCTCCTGAAGA |
| *SOX2* | Human | *SOX2* Forward | CGGACAGCGAACTGGAGG |
| *SOX2* Reverse | CTGTTTCTTACTCTCCTCTTTTGC |
| *GAPDH* | Human | *GAPDH* Forward | TCGACAGTCAGCCGCATCTTCTTT |
| *GAPDH* Reverse | ACCAAATCCGTTGACCTT |

**Supplementary Table** **5. Primers used for qPCR.**

The primers used for analyzing pluripotency genes by qPCR in human embryonic stem cells are indicated.

Extended Data Fig. 1.

**
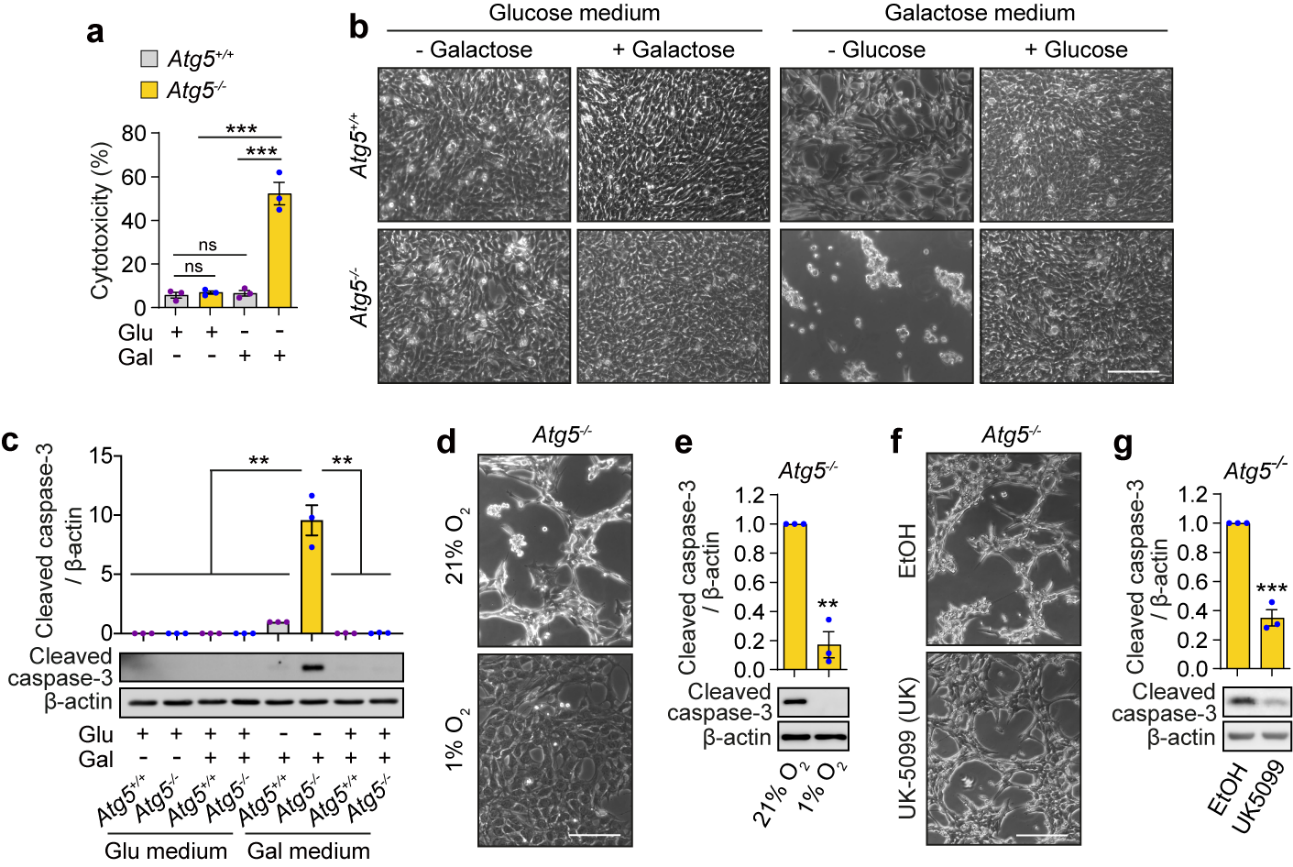
**

**Extended Data Fig. 1.** **Respiration-dependent apoptosis in *Atg5-/-* MEFs.**

**a,** Cytotoxicity assays in *Atg5+/+* or *Atg5-/-* MEFs cultured in glucose (glu) or galactose (gal) medium for 40 h. **b, c,** Phase contrast images (b) and immunoblot analyses (c) of *Atg5+/+* or *Atg5-/-* MEFs cultured in glucose (glu) or galactose (gal) medium with or without glu or gal for 24 h. **d–g,** Phase-contrast images (d, f) and immunoblot analyses (e, g) of *Atg5-/-* MEFs cultured in gal medium for 24 h in atmospheric oxygen (21 % O2), in hypoxia (1 % O2) (d, e), or in the presence or absence of UK-5099 (f, g). Graphical data are mean ± s.e.m of *n* = 3 biological replicates (a, c, e, g). *P* values were calculated by unpaired two-tailed Student’s *t*-test on three independent experiments (a, c, e, g). **P*<0.05; ***P*<0.01; ****P*<0.001; ns (non-significant). Scale bar, 200 µm (b, d, f).

Extended Data Fig. 2.


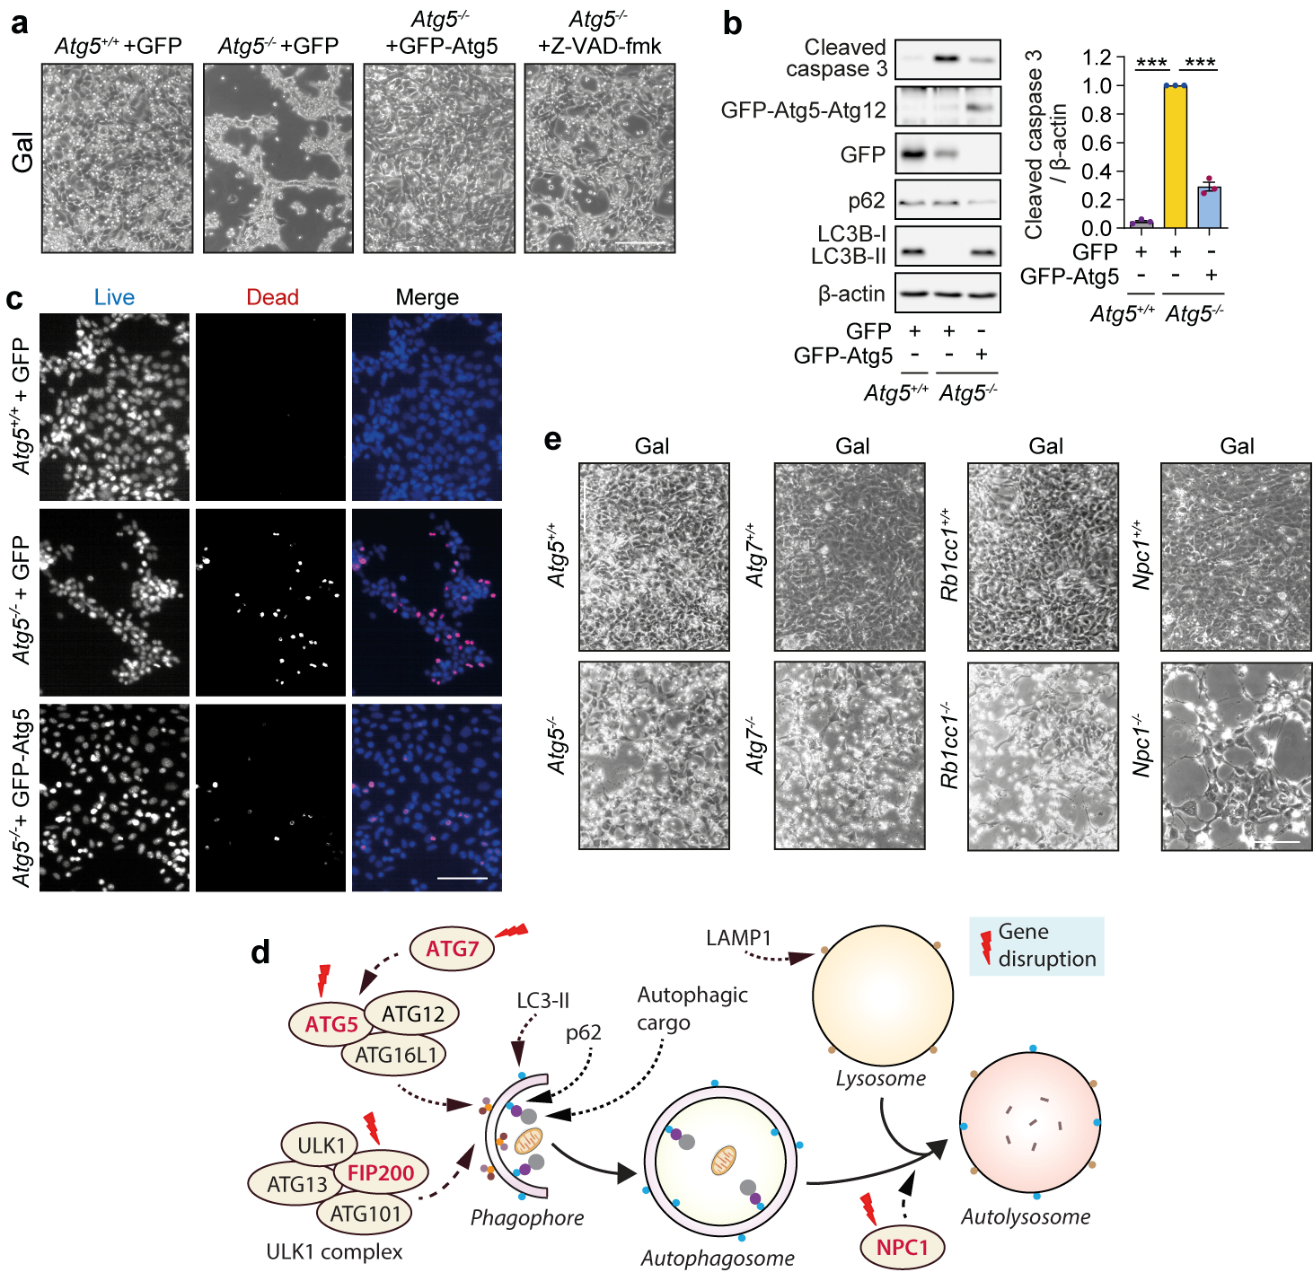


**Extended Data Fig. 2.** **Apoptotic phenotype in autophagy-deficient cell lines cultured in galactose media.**

**a,** Phase contrast images of *Atg5+/+*+GFP, *Atg5-/-*+GFP, *Atg5-/-*+GFP-Atg5 MEFs, or *Atg5-/-* MEFs supplemented with Z-VAD-fmk, cultured in gal medium for 24 h. **b,** Immunoblot analyses of *Atg5+/+*+GFP, *Atg5-/-*+GFP, *Atg5-/-*+GFP-Atg5 MEFs in the same conditions as (a). **c,** Staining for cell death with ReadyProbes fluorescent dyes in *Atg5+/+*+GFP, *Atg5-/-*+GFP and *Atg5-/-*+GFP-Atg5 MEFs 24 h after switch to gal medium. **d,** Schematic representation of the autophagy pathway showing autophagy markers and key proteins regulating this process. Specific gene disruptions are indicated in red. **e,** Phase-contrast images of isogenic *Atg5+/+* and *Atg5-/-*, *Atg7+/+* and *Atg7-/-*, *Rb1cc1+/+* and *Rbcc1-/-* cell lines (generated by the CRISPR-Cas9 system),and *Npc1+/+* and *Npc1-/-*MEFs, grown in gal medium for 110 h (*Atg5, Atg7* and *Rb1cc1* CRISPR-Cas9 generated cell lines) and 72 h (*Npc1* cell lines). Graphical data is mean ± s.e.m of *n* = 3 biological replicates (b). *P* values were calculated by unpaired two-tailed Student’s *t*-test on three independent experiments (b). ****P*<0.001. Scale bar, 200 µm (a, c, e).

Extended Data Fig. 3.


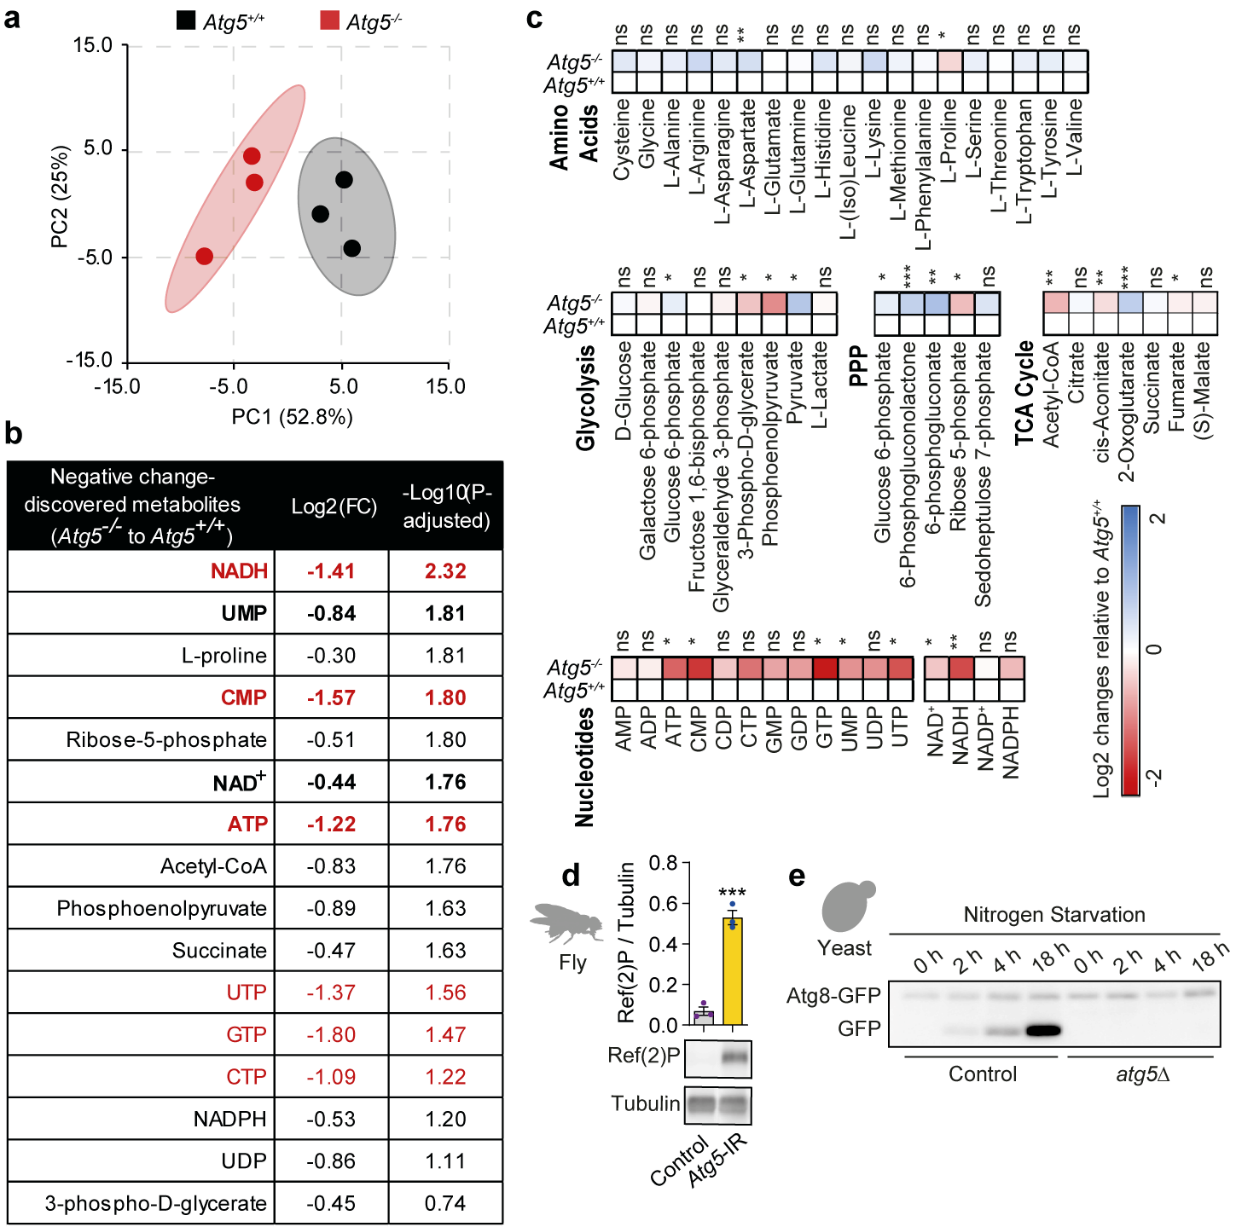


**Extended Data Fig. 3.** **Metabolic profiling of *Atg5* MEFs in galactose media, and loss of autophagy characterization in *atg5*Δ yeast and *ATG5*-IR flies.**

**a,** Two-dimensional principal component analysis (PCA) scores plot of metabolites in *Atg5+/+* (black) vs *Atg5-/-* (red) MEFs cultured in gal medium. **b,** List of discovered depleted metabolites. Highlighted are metabolites that change significantly (-1≥Log2(FC)≥1, log10(*P* adjusted>1.3, highlighted in red)) and correlate with cell death/survival (bold). **c,** Metabolite profiling in *Atg5+/+* and *Atg5-/-* MEFs is depicted as a heatmap of Log2(FC) of *Atg5-/-* to *Atg5+/+* MEFs based on their association to glucose oxidation pathways of glycolysis, pentose phosphate pathway (PPP) and tricarboxylic acid (TCA) cycle. **d,** Immunoblot analysis of whole-fly lysates from control and *ATG5*-IR flies (*n* = 10 flies per group). **e,** Immunoblot detection of Atg8-GFP cleavage as a readout of autophagy activation in control and *atg5*Δ yeast strains at indicated time points. Displayed immunoblot is a representative of two independent experiments (e). Graphical data is mean ± s.e.m of *n* = 3 biological replicates (d). *P* values were calculated by unpaired two-tailed Student’s *t*-test (d) or the multiple *t*-test original FDR method of Benjamini and Hochberg (c) on three independent experiments. ****P*<0.001.

Extended Data Fig. 4.


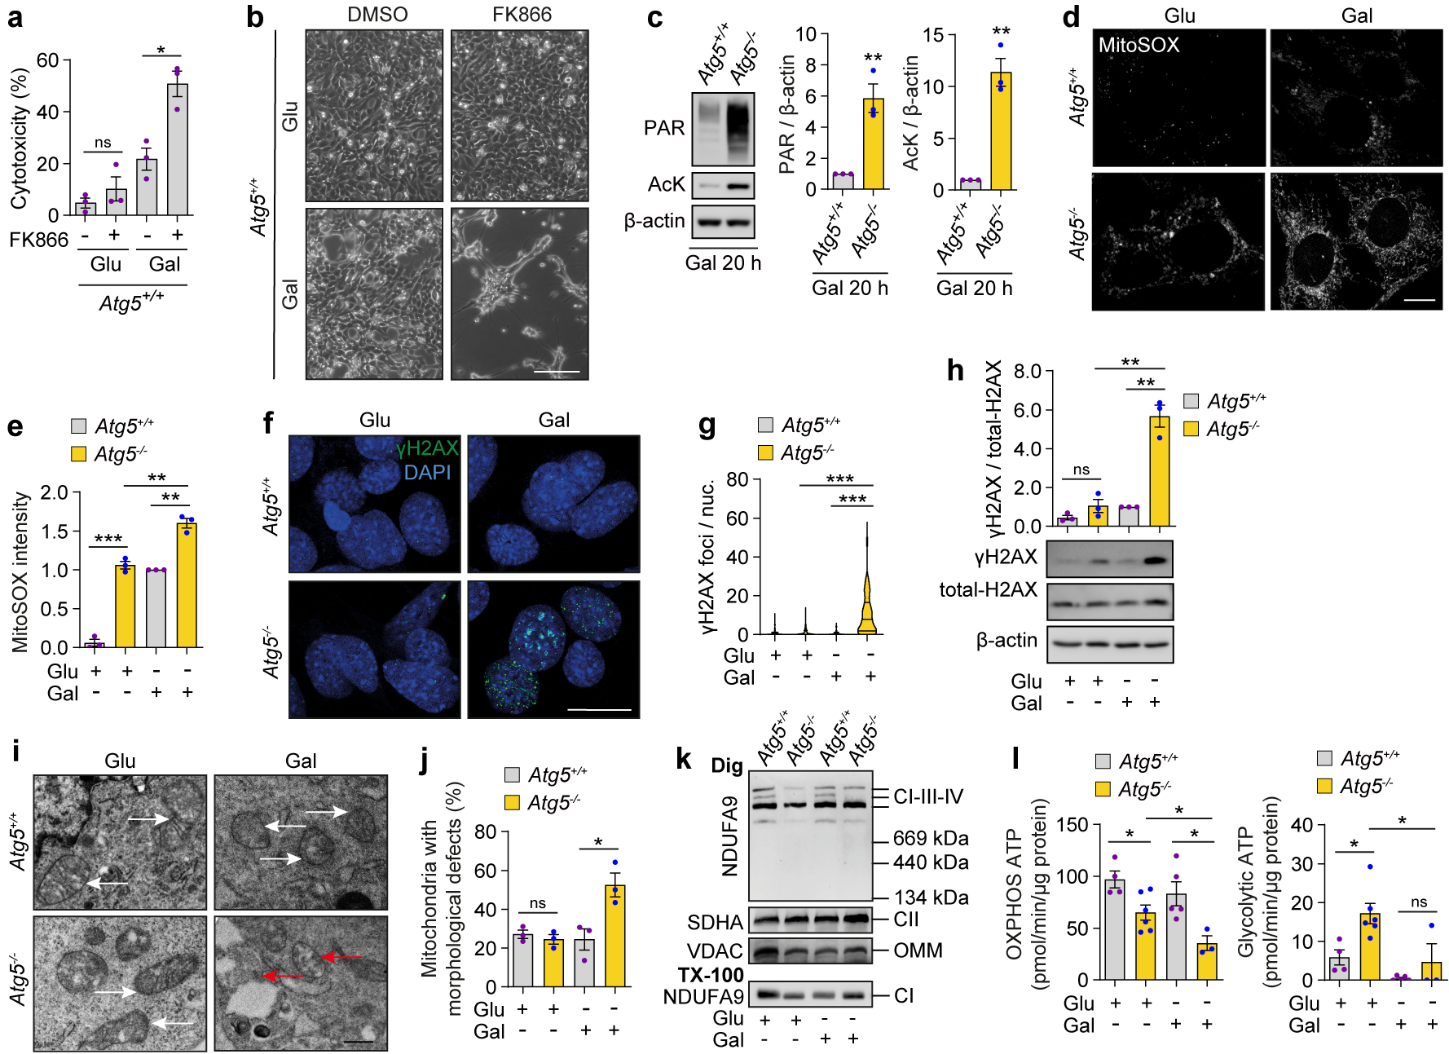


**Extended Data Fig. 4.** **Mitochondrial and DNA damage phenotypes in *Atg5-/-* cells in galactose media.**

**a, b,** Cytotoxicity assay (a) and phase-contrast images (b) in *Atg5+/+* MEFs cultured for 60 h (a) or 48 h (b) in glucose (glu) or galactose (gal) medium supplemented with FK866 or solvent (DMSO). **c,** Immunoblot analyses for acetylated lysine (AcK) and poly(ADP-ribose) (PAR) in *Atg5+/+*and *Atg5-/-* MEFs cultured in gal medium for 20 h. **d–l,** Fluorescence images (d) and quantification of MitoSox (e), immunofluorescence images (f) and quantification of γH2AX (g), γH2AX immunoblot analyses (h), transmission electron micrographs (i) and quantitation of mitochondrial morphology (j), Blue native PAGE (BN-PAGE) analyses of mitochondrial complex and supercomplex assembly (extracted using digitonin (Dig) and triton-X100 (TX-100) as indicated) (k), and Seahorse analyses of ATP production from OXPHOS (left) and glycolysis (right) (l) of *Atg5+/+* or *Atg5-/-* MEFs cultured in glu or gal medium for 24 h. Graphical data are mean ± s.e.m. of *n* = 3–5 (a, c, e, h, j, l) biological replicates as indicated, or displayed as violin plot (g). *P* values were calculated by unpaired two-tailed Student’s *t*-test on three independent experiments (a, c, e, g, h, j, l). **P*<0.05; ***P*<0.01; ****P*<0.001; ns (non-significant). Scale bar, 500 nm (i), 10 µm (d), 20 µm (f) or 200 µm (b).

Extended Data Fig. 5.


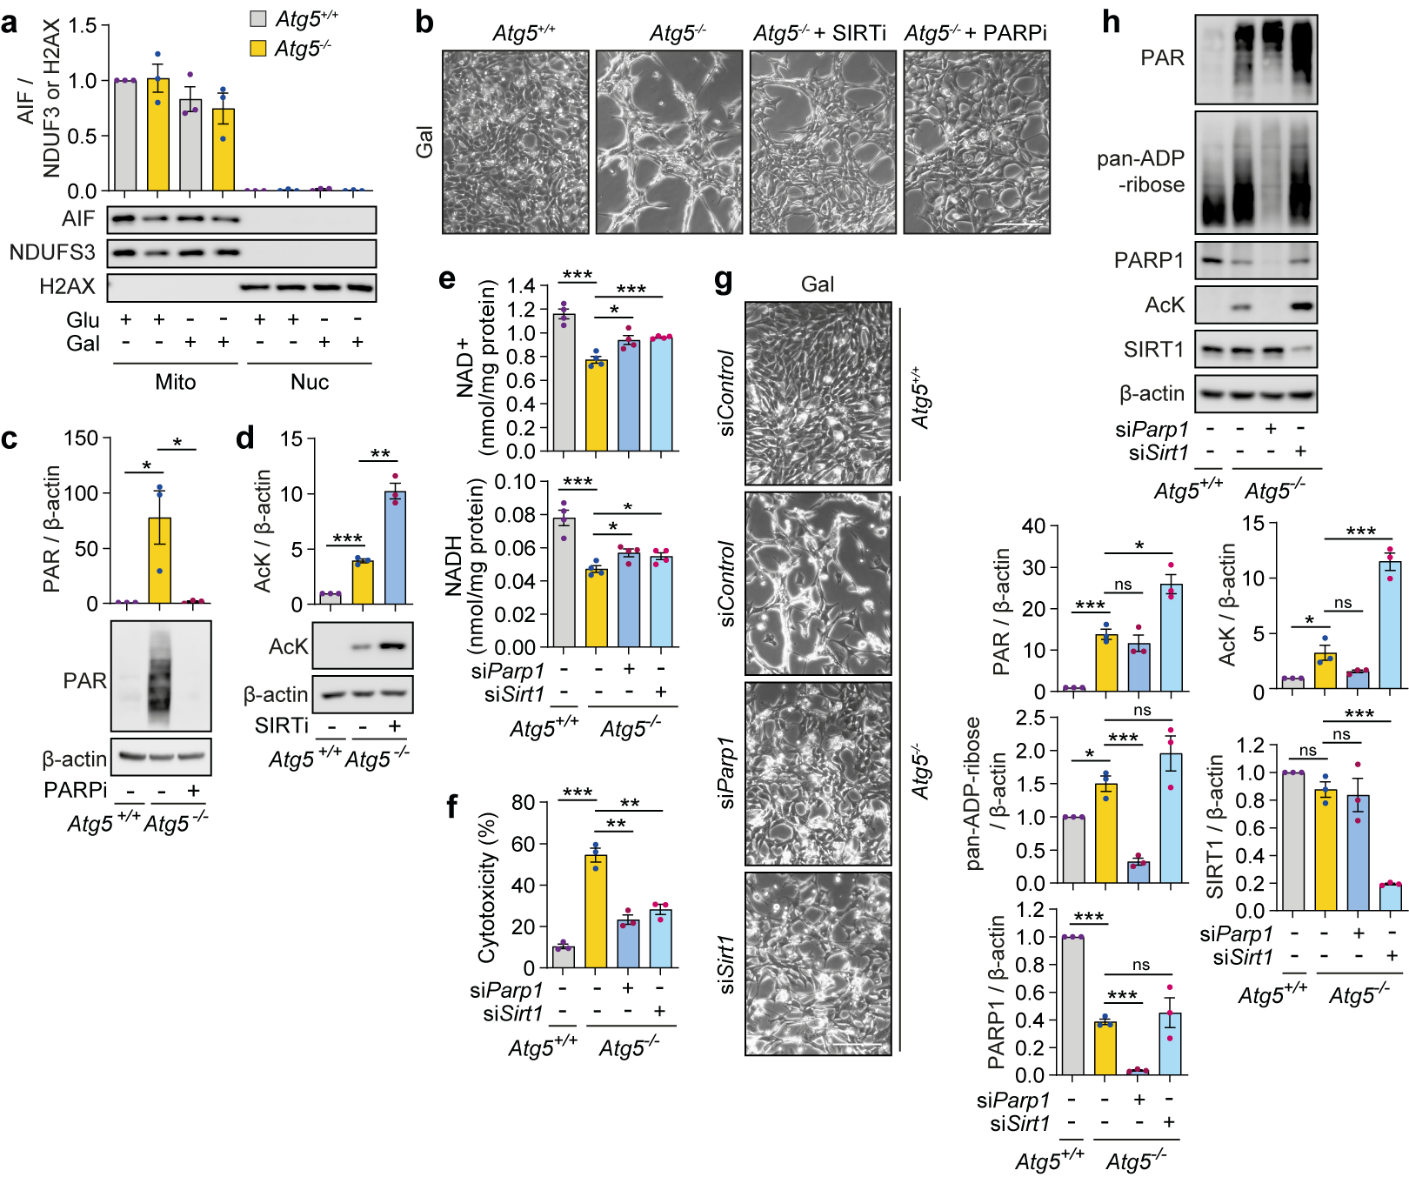


**Extended Data Fig. 5. Inhibition of PARP and SIRT improved NAD(H) levels and cell viability in *Atg5-/-* MEFs.**

**a,** Immunoblot analyses of mitochondrial and nuclear proteins (AIF, NDUFS3, H2AX) extracted from *Atg5+/+*and *Atg5-/-* MEFs after 24 h culture in glucose (glu) or galactose (gal) medium. **b–d,** Phase-contrast images (b) and immunoblot analyses for poly(ADP-ribose) (PAR) (c) and acetylated lysine (AcK) (d) in *Atg5+/+* and *Atg5-/-* MEFs cultured for 20 h (c, d) or 24 h (b) in gal medium supplemented with sirtinol (SIRTi), olaparib (PARPi) or solvent (DMSO). **e–h,** Measurement of NAD+ and NADH levels (e), cytotoxicity assay (f), phase-contrast images (g) and immunoblot analyses for PAR, AcK, pan-ADP-ribose, PARP1 or SIRT1 (h) in *Atg5+/+*and *Atg5-/-* MEFs transfected with *Control*, *Parp1* or *Sirt1* siRNA and cultured in gal medium for 20 h (e, g, h) or 40 h (f). Graphical data are mean ± s.e.m of *n* = 3 biological replicates (a, c–f, h). *P* values were calculated by unpaired two-tailed Student’s *t*-test on three independent experiments (a, c–f, h). **P*<0.05; ***P*<0.01; ****P*<0.001; ns (non-significant). Scale bar, 200 µm (b, g).

Extended Data Fig. 6.


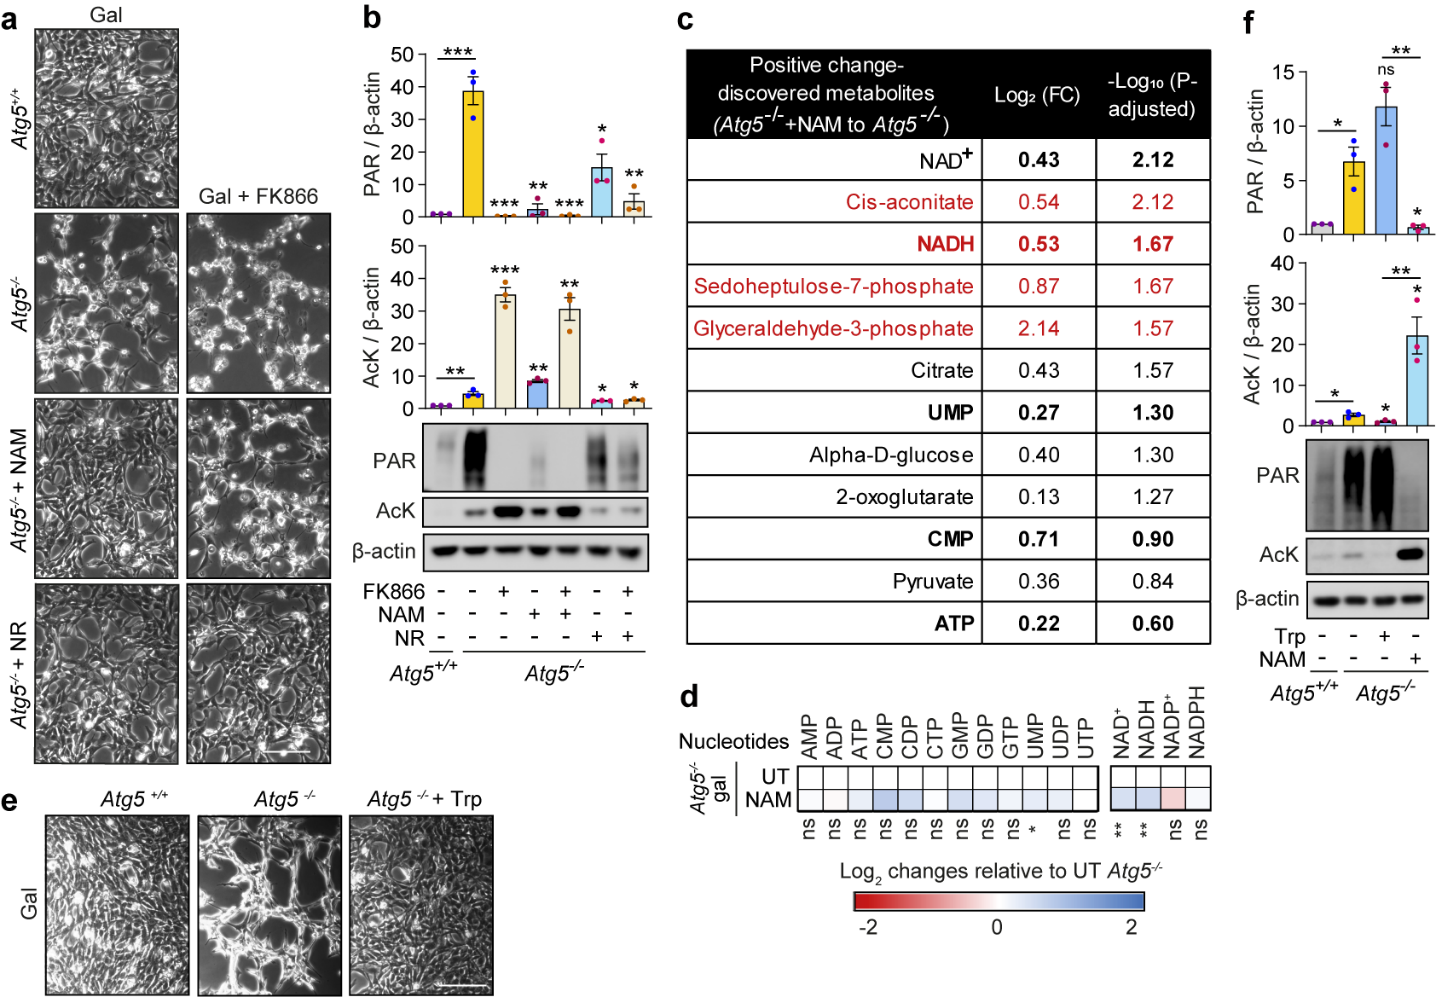


**Extended Data Fig. 6. Effects of NAD(H) boosting agents on cell death, metabolites and NADases in *Atg5-/-* MEFs.**

**a, b,** Phase-contrast images (a) and immunoblot analyses of poly(ADP-ribose) (PAR) and acetylated lysine (AcK) (b) in *Atg5+/+*and *Atg5-/-* MEFs cultured for 20 h in galactose (gal) medium with treatment of NAM or NR in the presence or absence of FK866. **c,** List of discovered depleted metabolites in *Atg5-/-* MEFs treated for 16 h with gal medium in the absence or presence of 3 mM NAM. Highlighted are metabolites that change significantly (-0.51≥Log2(FC)≥0.49, log10(*P* adjusted>1.3) (highlighted in red) and correlate with cell death/survival (bold). **d,** Metabolite profiling in *Atg5-/-* MEFs treated as in (c) is depicted as a heatmap of Log2 (fold change (FC)) of *Atg5-/-*+NAMto *Atg5-/-* MEFs, showing only the nucleotides. **e, f,** Phase-contrast images (e) and immunoblot analyses of PAR and AcK (f) in *Atg5+/+* and *Atg5-/-* MEFs cultured for 24 h (e) or 20 h (f) in gal medium with treatment of L-tryptophan (Trp) (e, f) or NAM (f). Graphical data are mean ± s.e.m of *n* = 3 biological replicates (b, f). *P* values were calculated by unpaired two-tailed Student’s *t*-test (b, f) or the multiple *t*-test original FDR method of Benjamini and Hochberg (c, d) on three (b–d, f) independent experiments. **P*<0.05; ***P*<0.01; ****P*<0.001; ns (non-significant). Scale bar, 200 µm (a, e).

Extended Data Fig. 7.


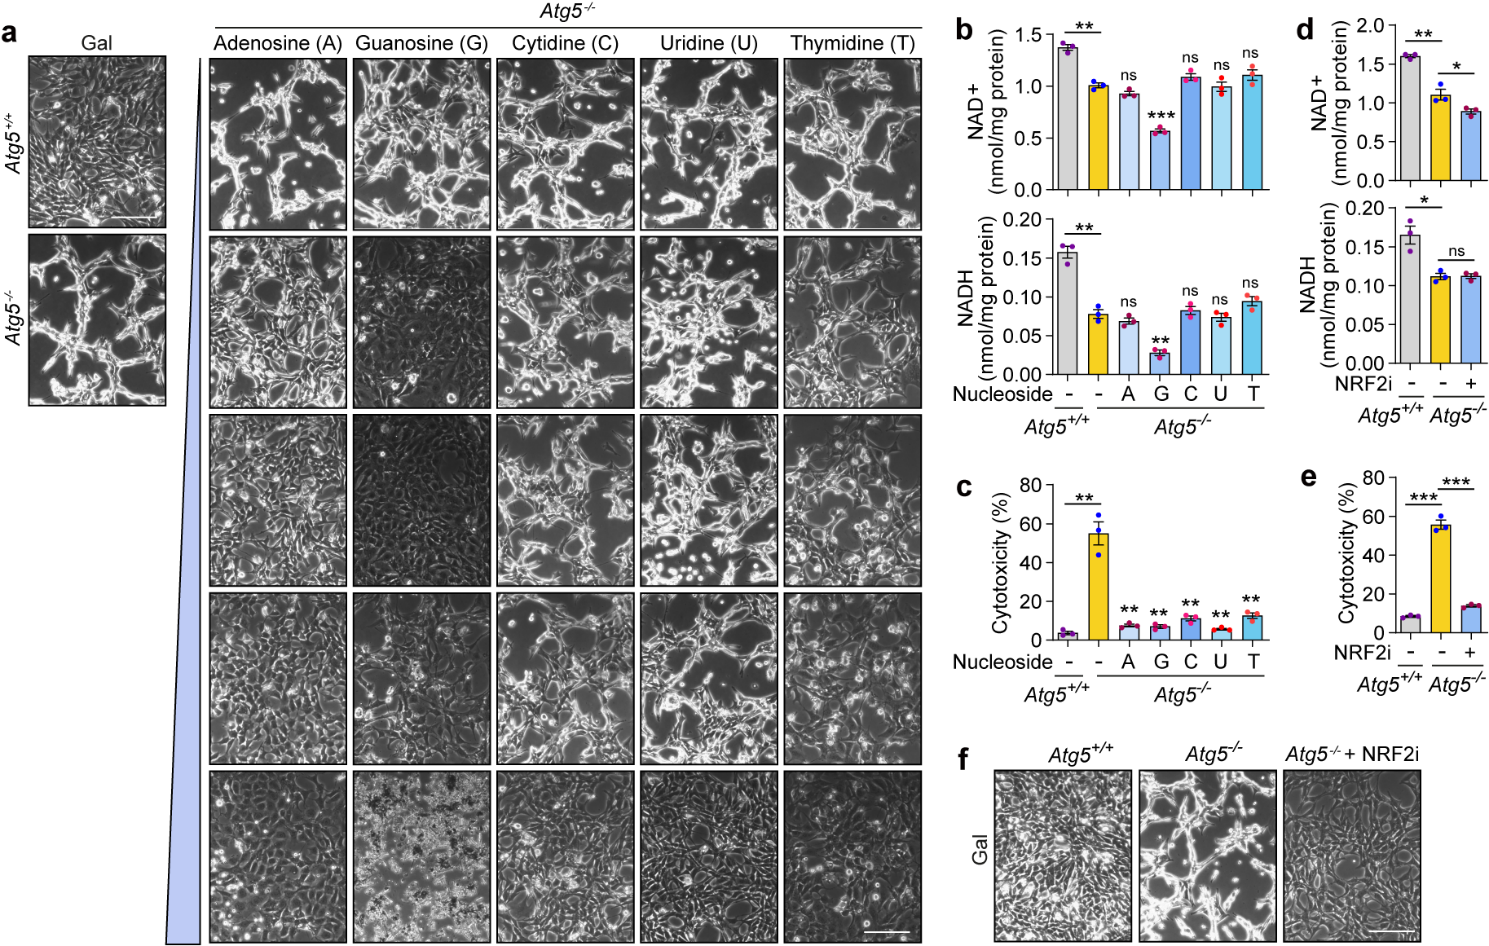


**Extended Data Fig. 7. NAD(H)-independent mechanisms of cell death in *Atg5-/-* MEFs.**

**a,** Phase-contrast images of *Atg5+/+* and *Atg5-/-* MEFs after 24 h culture in galactose (gal) medium supplemented with the different concentrations of nucleosides: 0.1, 0.3, 1, 3, 10 mM adenosine (A), cytidine (C), uridine (U), thymidine (T) or 0.05, 0.15, 0.5, 1.5, 5 mM guanosine (G). **b, c,** Measurement of NAD+ and NADH levels (b) and cytotoxicity assay (c) in *Atg5+/+* and *Atg5-/-* MEFs cultured in gal medium supplemented with 1 mM A, 1 mM G, 10 mM C, 10 mM U or 10 mM T for 20 h (b) or 40 h (c). **d–f,** Measurement of NAD+ and NADH levels (d), cytotoxicity assay (e) and phase-contrast images (f) in *Atg5+/+* and *Atg5-/-* MEFs cultured in gal medium and treated with ML385 (NRF2i) or solvent (DMSO) for 20 h (d), 24 h (f) or 40 h (e). Graphical data are mean ± s.e.m. of *n* = 3 biological replicates (b–e). *P* values were calculated by unpaired two-tailed Student’s *t*-test (b–e) on three independent experiments. **P*<0.05; ***P*<0.01; ****P*<0.001; ns (non-significant). Scale bar, 200 µm (a, f).

Extended Data Fig. 8.


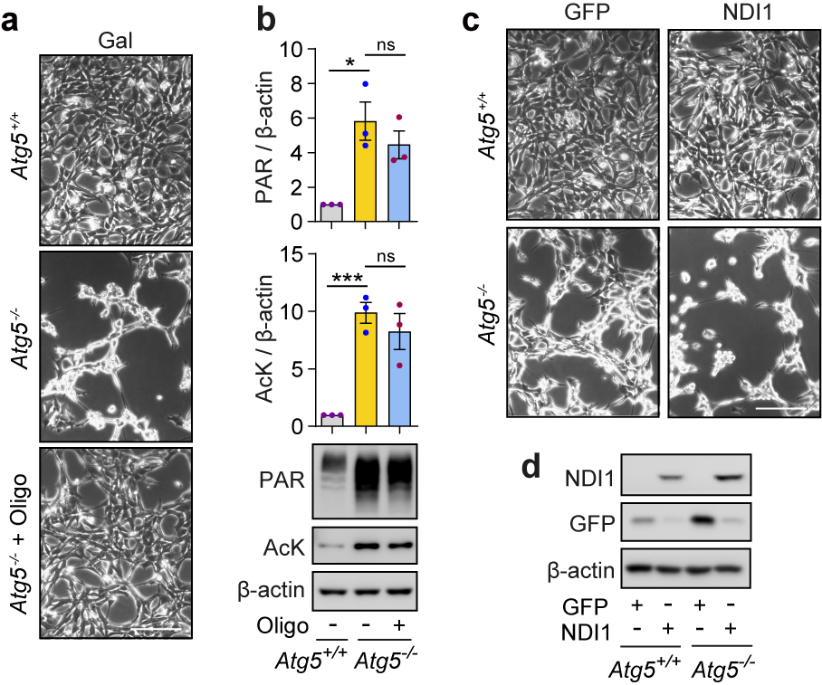


**Extended Data Fig. 8. Role of mitochondrial NADH in cell death due to autophagy deficiency.**

**a, b,** Phase-contrast images (a) and immunoblot analyses of poly(ADP-ribose) (PAR) and acetylated lysine (AcK) (b) in *Atg5+/+* and *Atg5-/-* MEFs after 20 h (b) or 24 h (a) culture in galactose (gal) medium treated with oligomycin (Oligo) or solvent (DMSO). **c, d,** Phase-contrast images (c) and immunoblot analyses of NDI1 and GFP (d) in *Atg5+/+* and *Atg5-/-* MEFs transfected with GFP-NDI1 (NDI1) or an empty plasmid (GFP) after 24 h culture in gal medium. Graphical data are mean ± s.e.m. of *n* = 3 biological replicates (b). *P* values were calculated by unpaired two-tailed Student’s *t*-test (b) on three independent experiments. **P*<0.05; ****P*<0.001; ns (non-significant). Scale bar, 200 µm (a, c).

Extended Data Fig. 9.


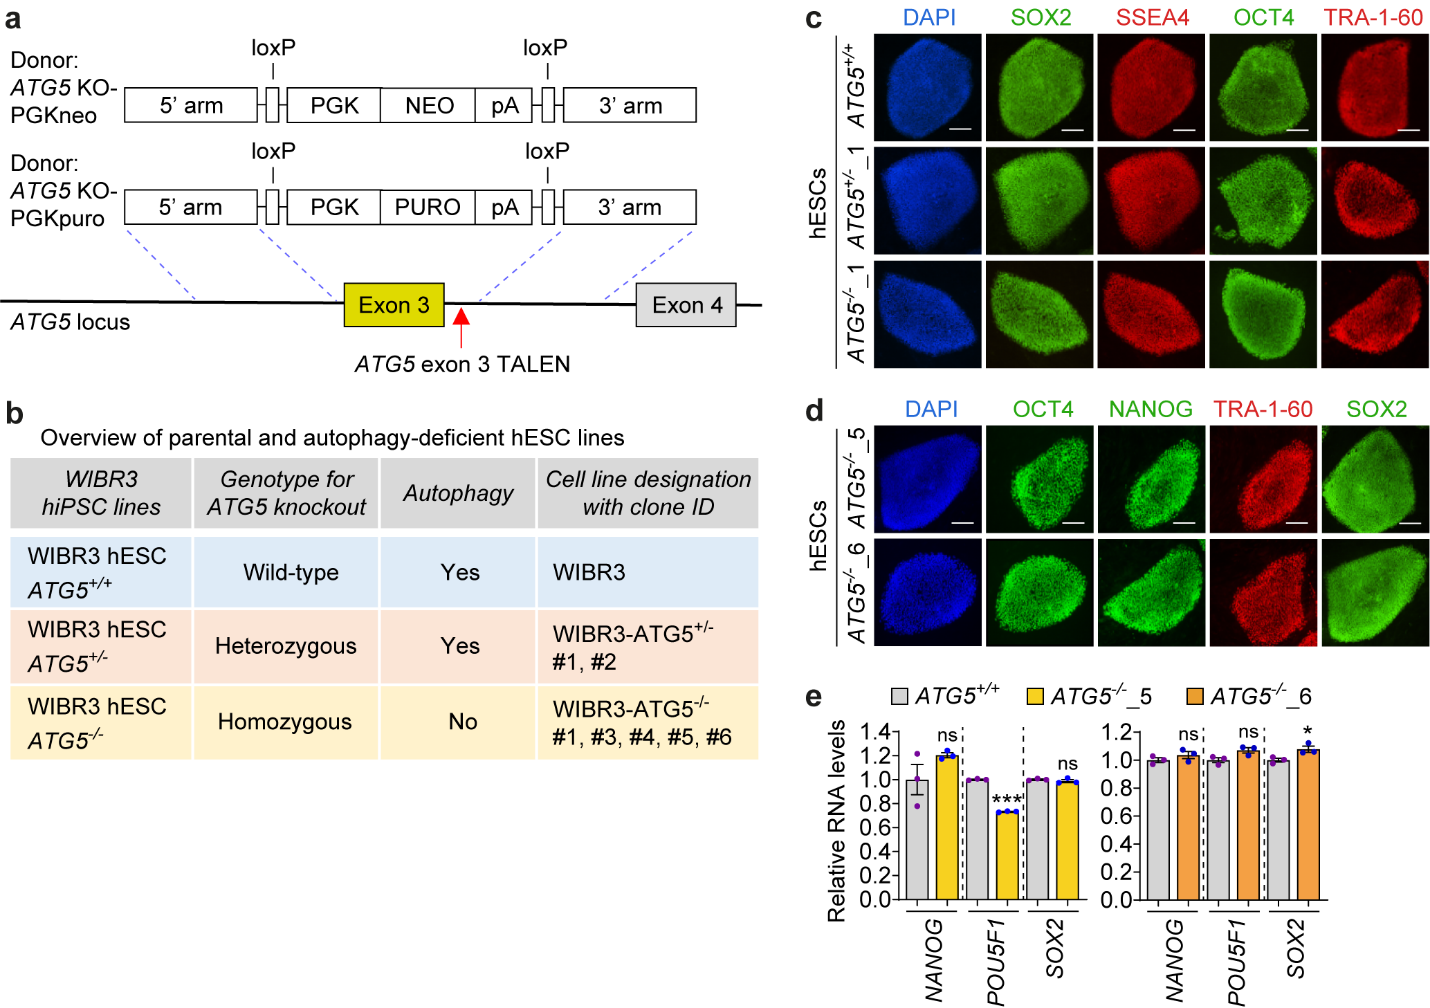


**Extended Data Fig. 9. Generation of autophagy-deficient human embryonic stem cells.**

**a,** Targeting strategy in human embryonic stem cells (hESCs) for deleting exon 3 in human *ATG5* gene by TALENs. **b,** List of autophagy-deficient hESC lines generated by genome editing in parental WIBR3 hESCs. **c, d,** Immunofluorescence images of SOX2, SSEA4, OCT4, TRA-1-60 and NANOG (pluripotency markers) and DAPI staining in *ATG5+/+*, *ATG5+/–*_1 and *ATG5–/–*_1(c), *ATG5–/–*_5 and *ATG5–/–*_6(d) hESCs. **e,** Quantitative RT-PCR expression analyses of *NANOG*, *POU5F1 (OCT4)* and *SOX2* (pluripotency genes) relative to *GAPDH* in *ATG5+/+*, *ATG5–/–*_5 and *ATG5–/–*_6hESCs. Graphical data are mean ± s.e.m. of *n* = 3 biological replicates (e). *P* values were calculated by unpaired two-tailed Student’s *t*-test on three independent experiments (e). **P*<0.05; ****P*<0.001; ns (non-significant). Scale bar, 200 µm (c, d).

Extended Data Fig. 10.


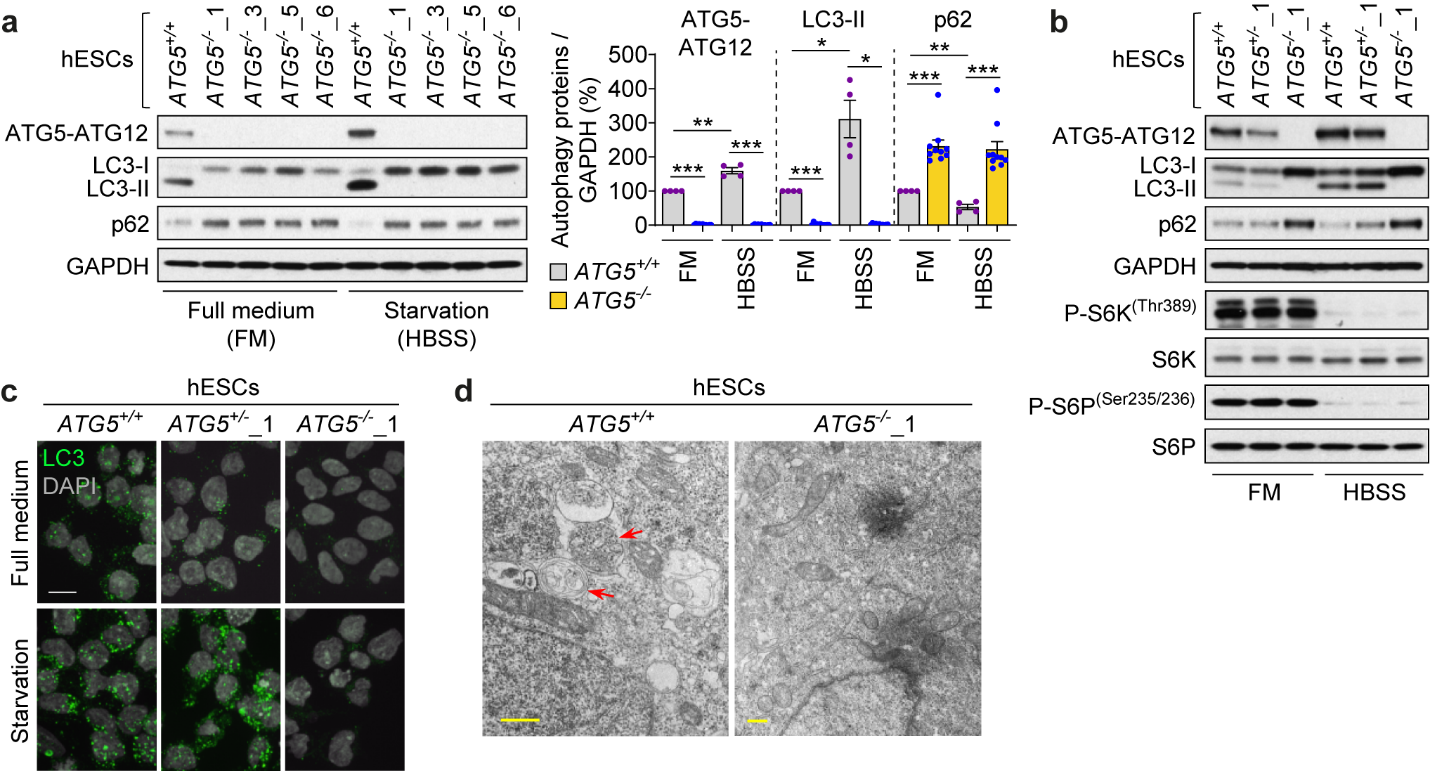


**Extended Data Fig. 10. Characterization of *ATG5–/–* hESCs for loss of autophagy.**

**a,** Immunoblotting analyses of ATG5, LC3 and p62 in *ATG5+/+* and multiple clones of *ATG5–/–* hESCs, cultured in full growth medium (FM) or starvation condition (HBSS for 3 h). **b,** Immunoblotting analyses of ATG5, LC3, p62, phospho-p70 S6 kinase (P-S6KThr389), p70 S6 kinase (S6K), phospho-S6 ribosomal protein (P-S6PSer235/236) and S6 ribosomal protein (S6P) in *ATG5+/+*, *ATG5+/–*_1 and *ATG5–/–*_1hESCs, cultured in FM or HBSS for 3 h. **c,** Immunofluorescence images of LC3 puncta in *ATG5+/+*, *ATG5+/–*_1 and *ATG5–/–*_1hESCs, cultured either in FM or HBSS for 3 h. **d,** Electron micrographs of *ATG5+/+* and *ATG5–/–*_1hESCs where autophagic vacuoles in *ATG5+/+* hESCs were indicated by red arrows.Graphical data are mean ± s.e.m. of *n* = 4 or more biological replicates as indicated (a). *P* values were calculated by unpaired two-tailed Student’s *t*-test on four independent experiments (a). **P*<0.05; ***P*<0.01; ****P*<0.001. Scale bar, 100 µm (c) or 500 nm (d).

Extended Data Fig. 11.


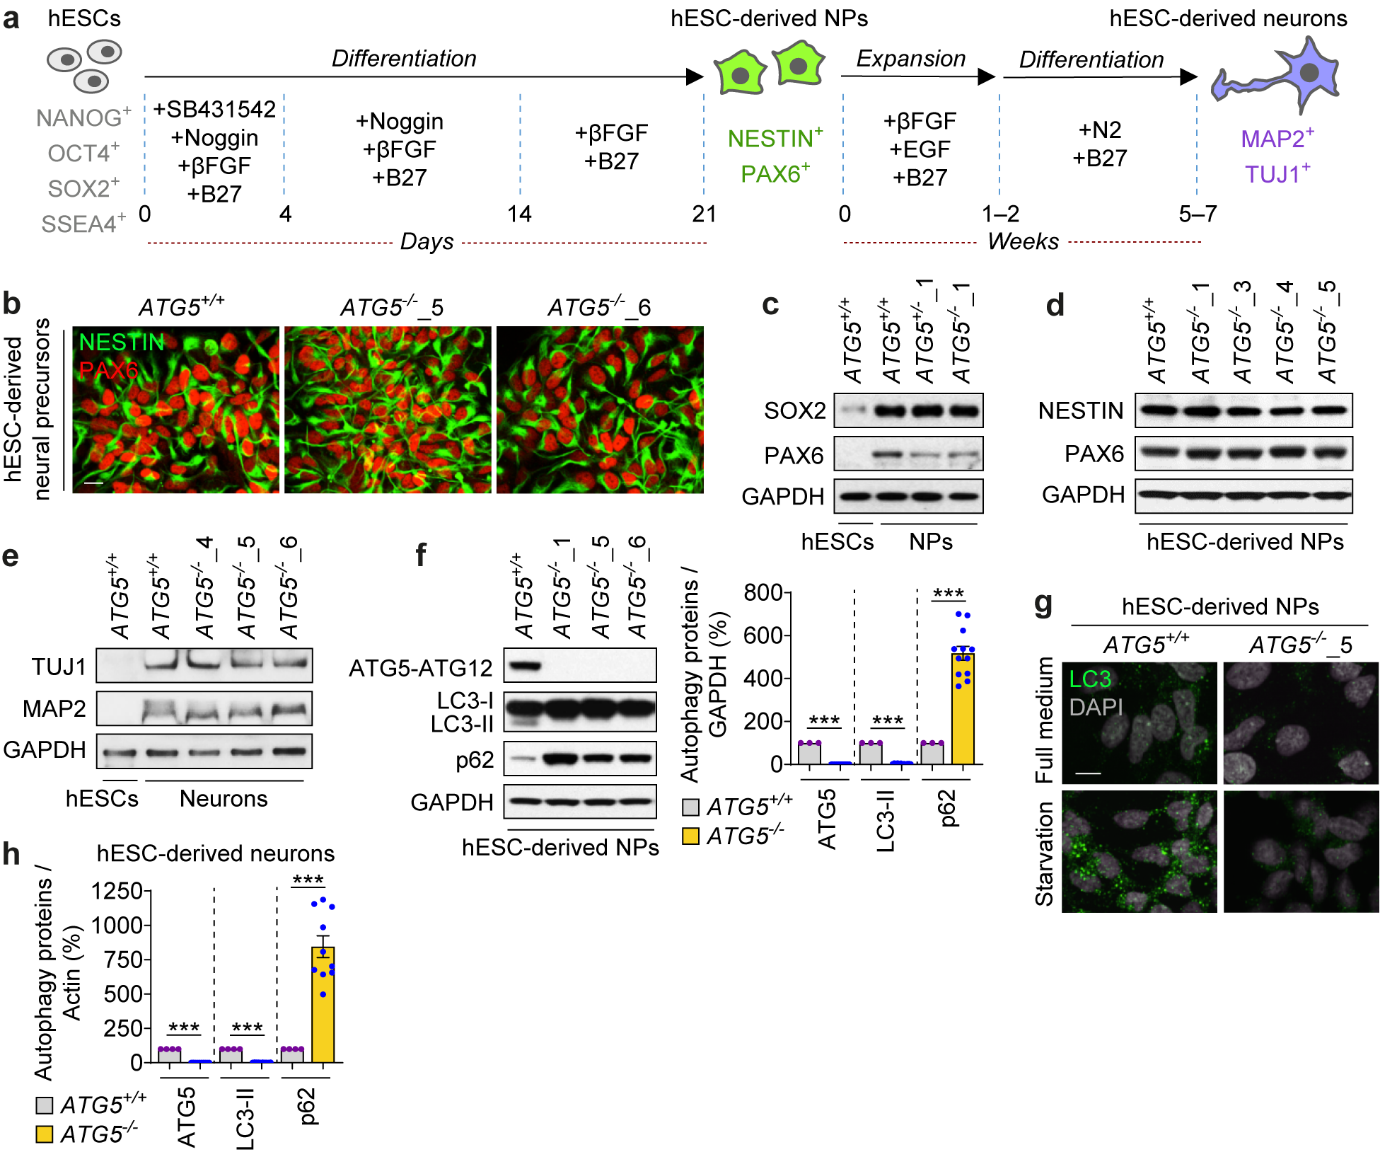


**Extended Data Fig. 11. Characterisation of autophagy-deficient hESC-derived NPs and neurons.**

**a,** Schematic representation of the differentiation method of hESCs into neural precursors (NPs) and then to neurons. **b,** Immunofluorescence images of NESTIN and PAX6 in *ATG5+/+*, *ATG5–/–*_5and *ATG5–/–*_6hESC-derived NPs. **c, d,** Immunoblotting analyses of SOX2, PAX6 and NESTIN in *ATG5+/+*, *ATG5+/–*_1 and *ATG5–/–*_1 hESC-derived NPs, along with *ATG5+/+* hESCs (c), and in *ATG5+/+* and multiple clones of *ATG5–/–* hESC-derived NPs (d). **e,** Immunoblotting analyses of TUJ1 and MAP2 in *ATG5+/+* and multiple clones of *ATG5–/–* hESC-derived neurons (4-weeks old), along with *ATG5+/+* hESCs. **f,** Immunoblotting analyses of ATG5, LC3 and p62 in *ATG5+/+* and multiple clones of *ATG5–/–* hESC-derived NPs. **g,** Immunofluorescence images of LC3 puncta in *ATG5+/+* and *ATG5–/–*_5hESC-derived NPs, cultured either in full growth medium or starvation condition (HBSS for 1 h). **h,** Densitometry analysis of ATG5, LC3 and p62 levels relative to Actin (from immunoblotting in Fig. 4b) in *ATG5+/+* and multiple clones of *ATG5–/–* hESC-derived neurons (4-weeks old). Graphical data are mean ± s.e.m. of *n* = 3 or more biological replicates as indicated (f, h). *P* values were calculated by unpaired two-tailed Student’s *t*-test on three (f) or four (h) independent experiments. ****P*<0.001. Scale bar, 100 µm (b, g).

Extended Data Fig. 12.


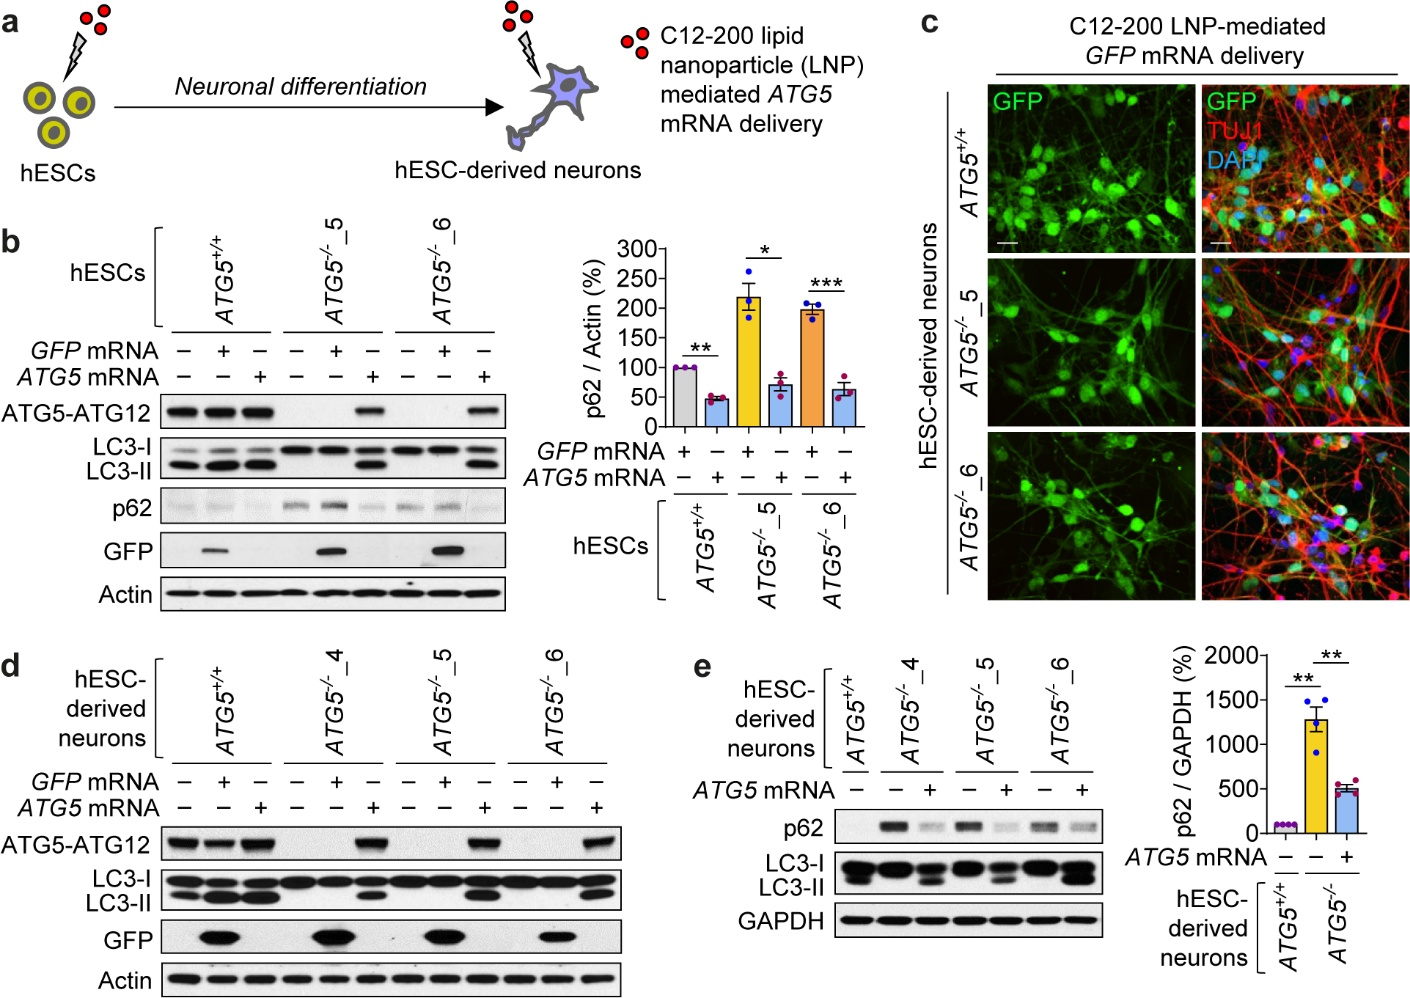


**Extended Data Fig. 12. Lipid nanoparticle-mediated *ATG5* mRNA delivery restored autophagic flux in *ATG5–/–* hESCs and hESC-derived neurons.**

**a,** Schematic representation of lipid nanoparticle (LNP) mediated mRNA delivery in hESCs and hESC-derived neurons. **b,** Immunoblotting analyses of ATG5, LC3, p62 and GFP in *ATG5+/+*, *ATG5–/–*_5and *ATG5–/–*_6hESCs, treated for 4 days with or without C12-200 LNP containing 2 µg/mL of *GFP* or *ATG5* mRNA. **c,** Immunofluorescence images of TUJ1 and GFP expression in *ATG5+/+*, *ATG5–/–*_5and *ATG5–/–*_6hESC-derived neurons (4-weeks old), treated for 2 days with C12-200 LNP containing 2 µg/mL of *GFP* mRNA. **d, e,** Immunoblotting analyses of ATG5, LC3, GFP (d) and p62, LC3 (e) in *ATG5+/+* and multiple clones of *ATG5–/–* hESC-derived neurons (4-weeks old), treated for 4 days with or without C12-200 LNP containing 2 µg/mL of *GFP* or *ATG5* mRNA. Graphical data are mean ± s.e.m. of *n* = 3–4 biological replicates as indicated (b, e). *P* values were calculated by unpaired two-tailed Student’s *t*-test on three independent experiments (b, e). **P*<0.05; ***P*<0.01; ****P*<0.001. Scale bar, 100 µm (c).

Extended Data Fig. 13.


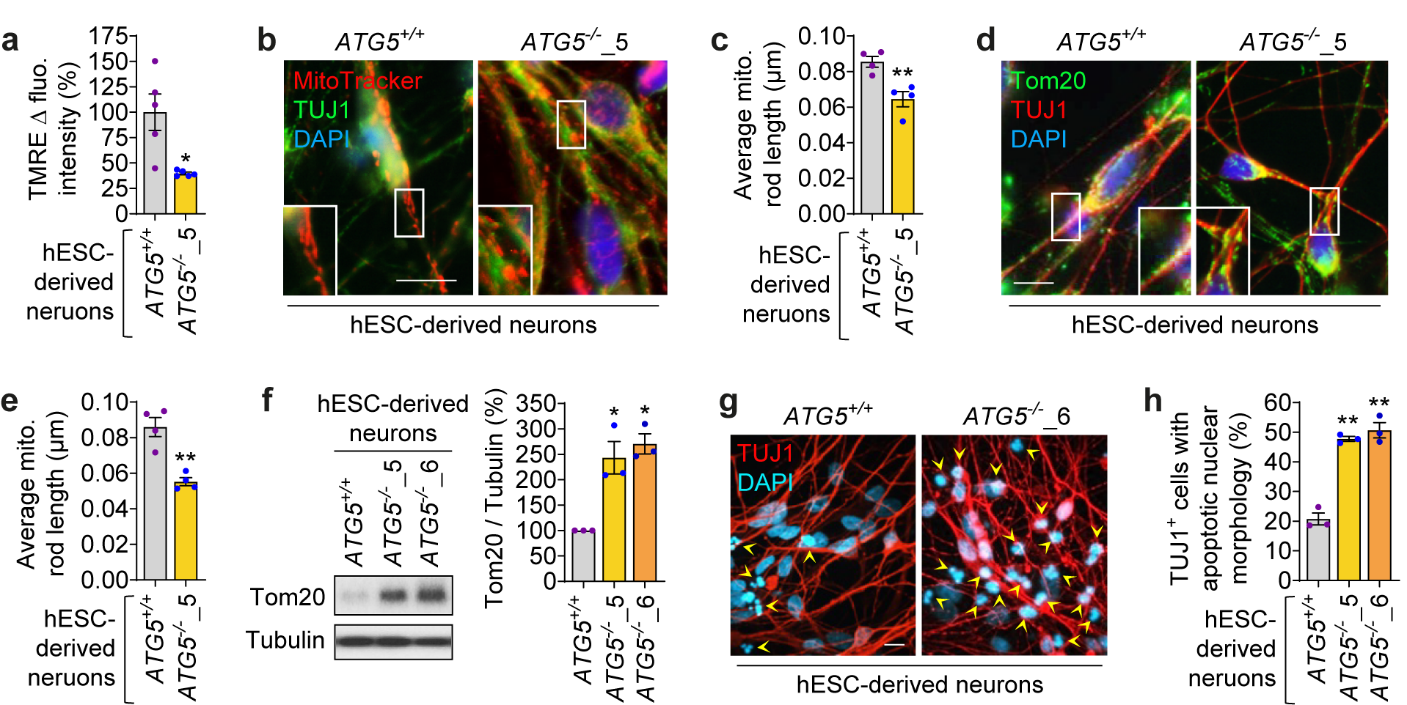


**Extended Data Fig. 13. Mitochondrial dysfunction and cell death in *ATG5–/–* hESC-derived neurons.**

**a,** Measurement of TMRE Δ fluorescence intensity (pre and post FCCP treatment) for ΔΨm in *ATG5+/+* and *ATG5–/–*_5hESC-derived neurons (3-weeks old). **b–e,** Immunofluorescence images of TUJ1 (b, d), MitoTracker staining (b) or Tom20 (d), and analysis of average mitochondrial rod length per image (c, e), in *ATG5+/+* and *ATG5–/–*_5hESC-derived neurons (3-weeks old). **f,** Immunoblotting analysis of Tom20 in *ATG5+/+*, *ATG5–/–*_5and *ATG5–/–*_6hESC-derived neurons (3-weeks old). **(g, h)** Immunofluorescence images of TUJ1 and DAPI staining (g) and quantification of apoptotic nuclear morphology (h) in *ATG5+/+*, *ATG5–/–*_5 and *ATG5–/–*_6hESC-derived neurons (4-weeks old). Graphical data are mean ± s.e.m. of *n* = 3–5 biological replicates as indicated (a, c, e, f, h). *P* values were calculated by unpaired two-tailed Student’s *t*-test on two (c, e, h) or three (a, f) independent experiments. **P*<0.05; ***P*<0.01. Scale bar, 10 µm (b, d) or 100 µm (g).

Extended Data Fig. 14.


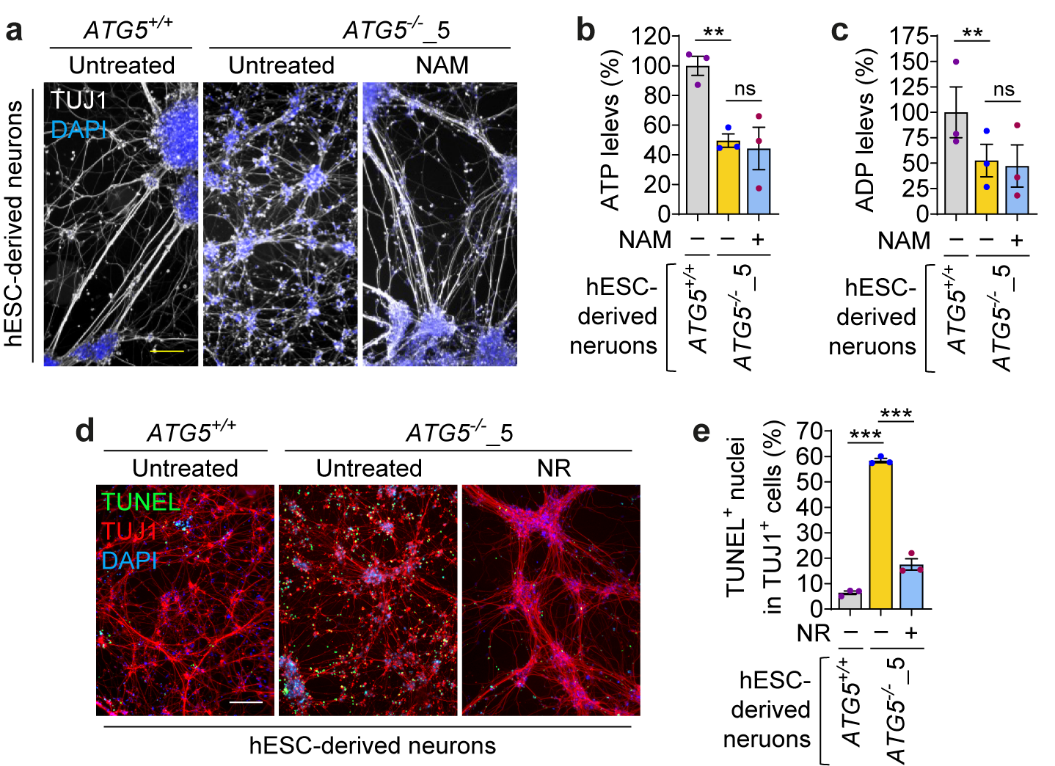


**Extended Data Fig. 14. Boosting NAD(H) improved cell viability in *ATG5-/-* hESC-derived neurons independent of ATP levels.**

**a,** Immunofluorescence images of TUJ1 and DAPI staining in *ATG5+/+* and *ATG5–/–*_5hESC-derived neurons (3-weeks old), where *ATG5–/–* neurons were treated with or without nicotinamide (NAM) for the last 6 days. **b, c,** Measurements of ATP (b) and ADP (c) levels in *ATG5+/+* and *ATG5–/–*_5hESC-derived neurons (3-weeks old), where *ATG5–/–* neurons were treated with or without NAM for the last 6 days. **d, e,** Immunofluorescence images of TUJ1 with TUNEL staining (d) and quantification of TUNEL+ apoptotic nuclei (e) in *ATG5+/+* and *ATG5–/–*_5hESC-derived neurons (3-weeks old), where *ATG5–/–* neurons were treated with or without nicotinamide riboside (NR) for the last 6 days. Graphical data are mean ± s.e.m. of *n* = 3–5 biological replicates as indicated (b, c, e). *P* values were calculated by unpaired two-tailed Student’s *t*-test on two (e) or three (b, c) independent experiments. ***P*<0.01; ****P*<0.001; ns (non-significant). Scale bar, 100 µm (a, d).

Extended Data Fig. 15.


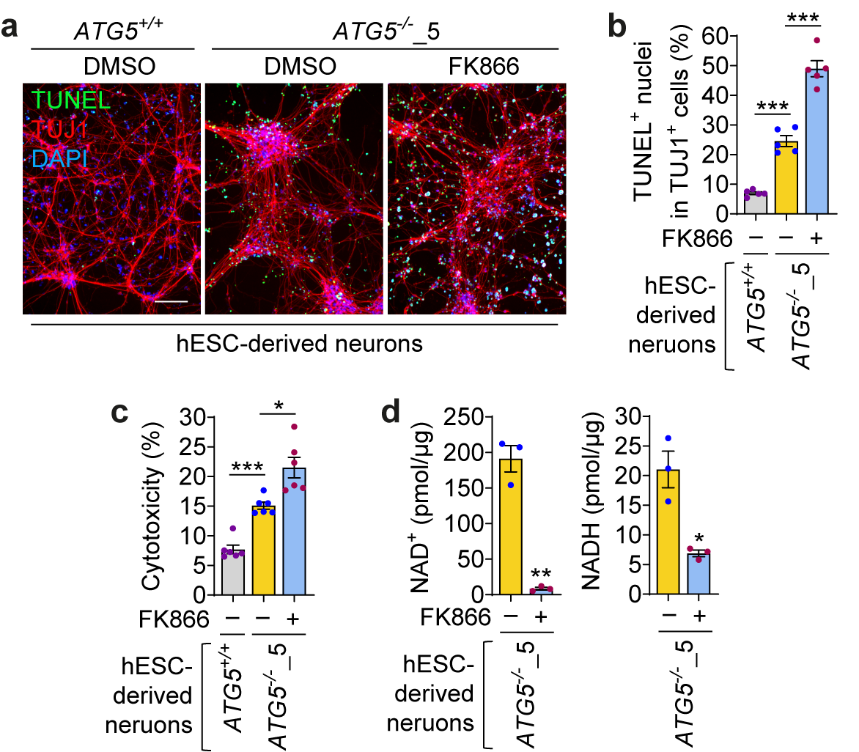


**Extended Data Fig. 15. NAMPT inhibitor FK888 decreased NAD(H) levels and cell viability in *ATG5-/-* hESC-derived neurons.**

**a–d,** Immunofluorescence images of TUJ1 with TUNEL staining (a), quantification of TUNEL+ apoptotic nuclei (b), cytotoxicity assay (c) and measurements of NAD+ and NADH levels (d) in *ATG5+/+* (a–c) and *ATG5–/–*_5(a–d) hESC-derived neurons (3-weeks old), where *ATG5–/–* neurons were treated with or without FK866 for the last 6 days (a–d).Graphical data are mean ± s.e.m. of *n* = 3–6 biological replicates as indicated (b–d). *P* values were calculated by unpaired two-tailed Student’s *t*-test on two (c) or three (b, d) independent experiments. **P*<0.05; ***P*<0.01; ****P*<0.001. Scale bar, 100 µm (a).

Extended Data Fig. 16.


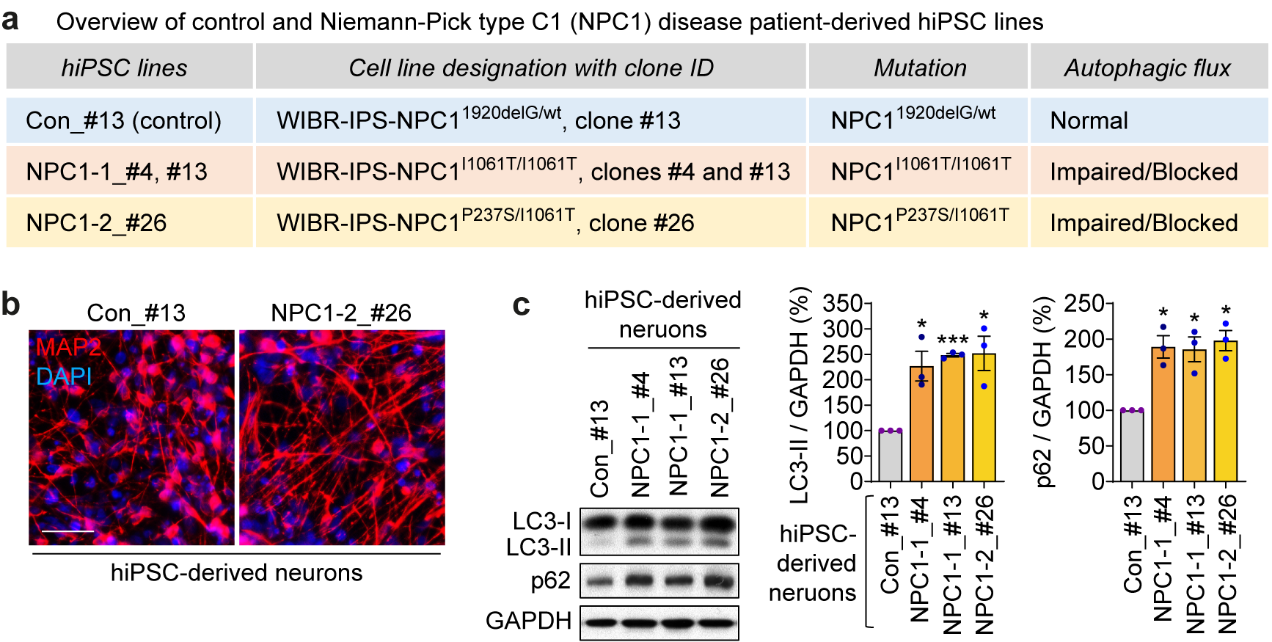


**Extended Data Fig. 16. Impairment of autophagic flux in NPC1 patient hiPSC-derived neurons.**

**a,** Overview of control and NPC1 patient-derived hiPSC lines, as previously described4. **b,** Immunofluorescence images of MAP2 in control (Con_#13) and NPC1 (NPC1-2_#26) hiPSC-derived neurons (4-weeks old). **c,** Immunoblotting analyses of LC3 and p62 in control (Con_#13) and NPC1 (NPC1-1_#4, NPC1-1_#13, NPC1-2_#26) hiPSC-derived neurons (4-weeks old); increased LC3-II and p62 levels in NPC1 neurons indicate an impairment in autophagic flux due to a block in autophagy at a late stage of the process, as previously described4,17. Graphical data are mean ± s.e.m. of *n* = 3 biological replicates (c). *P* values were calculated by unpaired two-tailed Student’s *t*-test on three independent experiments (c). **P*<0.05; ****P*<0.001. Scale bar, 100 µm (b).
